# Supplementary material for: Inter-chromosomal coupling between vision and pigmentation genes during genomic divergence
Source: Springer Nature journal article supplement (doi:10.1038/s41559-019-0814-5), 2019-03-04
Supplement: MOESM1 [file 41559_2019_814_MOESM1_ESM.pdf]

In the format provided by the authors and unedited.

# Inter-chromosomal coupling between vision and pigmentation genes during genomic divergence

Kosmas Hench <sup>1\*</sup>, Marta Vargas<sup>2</sup>, Marc P. Höppner<sup>3</sup>, W. Owen McMillan<sup>2</sup> and Oscar Puebla <sup>1,2,4\*</sup>

---

<sup>1</sup>Evolutionary Ecology of Marine Fishes, GEOMAR Helmholtz Centre for Ocean Research Kiel, Kiel, Germany. <sup>2</sup>Smithsonian Tropical Research Institute, Panamá, Panama. <sup>3</sup>Institute of Clinical Molecular Biology, Christian Albrechts University of Kiel, Kiel, Germany. <sup>4</sup>Faculty of Mathematics and Natural Sciences, University of Kiel, Kiel, Germany. \*e-mail: [khench@geomar.de](mailto:khench@geomar.de); [oscar.puebla@mail.mcgill.ca](mailto:oscar.puebla@mail.mcgill.ca)

# Inter-chromosomal coupling between vision and pigmentation genes during genomic divergence (Supplementary Information)

Kosmas Hench<sup>1,\*</sup>, Marta Vargas<sup>2</sup>, Marc P. Höppner<sup>3</sup>, W. Owen McMillan<sup>2</sup>, and Oscar Puebla<sup>1,4,2,\*</sup>

<sup>1</sup>GEOMAR Helmholtz Centre for Ocean Research Kiel, Evolutionary Ecology of Marine Fishes,  
Düsternbrooker Weg 20, 24105 Kiel, Germany

<sup>2</sup>Smithsonian Tropical Research Institute, Apartado Postal 0843-03092, Panamá, República de Panamá

<sup>3</sup>Institute of Clinical Molecular Biology, Christian Albrechts University of Kiel, Kiel, Germany

<sup>4</sup>University of Kiel, Faculty of Mathematics and Natural Sciences, Christian-Albrechts-Platz 4, 24118 Kiel,  
Germany

\*oscar.puebla@mail.mcgill.ca, khench@geomar.de

## List of Supplementary Figures

|         |                                                                                                                                                           |    |
|---------|-----------------------------------------------------------------------------------------------------------------------------------------------------------|----|
| 1       | Broad-scale synteny between the hamlet and stickleback genomes . . . . .                                                                                  | 4  |
| 2       | Identification of putative backcrosses and hybrids . . . . .                                                                                              | 5  |
| 3       | Genome wide $G \times P$ association . . . . .                                                                                                            | 6  |
| 4       | Large low-recombining region on linkage group 8 (LG08) . . . . .                                                                                          | 7  |
| 5       | Extent of differentiation under various scenarios . . . . .                                                                                               | 8  |
| 6       | Gene expression in the retinal tissue . . . . .                                                                                                           | 9  |
| 7       | Genomic intervals above the 99.90th $F_{ST}$ percentile . . . . .                                                                                         | 9  |
| 8 (I)   | Close-up on all the intervals above the 99.90th $F_{ST}$ percentile . . . . .                                                                             | 10 |
| 8 (II)  | Close-up on all the intervals above the 99.90th $F_{ST}$ percentile . . . . .                                                                             | 11 |
| 8 (III) | Close-up on all the intervals above the 99.90th $F_{ST}$ percentile . . . . .                                                                             | 12 |
| 9       | Close-up on the four additional intervals containing candidate vision and pigmentation genes                                                              | 13 |
| 10      | Genome-wide recombination patterns . . . . .                                                                                                              | 14 |
| 11      | Long-distance and inter-chromosomal linkage disequilibrium (LD) among the eight intervals<br>containing candidate vision and pigmentation genes . . . . . | 15 |
| 12      | Patterns of genomic differentiation among hamlets from Belize, Honduras and Panama . .                                                                    | 16 |
| 13      | Long-distance and inter-chromosomal linkage disequilibrium (LD) among the four candidate<br>intervals for each species pair . . . . .                     | 17 |
| 14      | Long-distance and inter-chromosomal linkage disequilibrium (LD) among the eight intervals<br>containing vision and pigmentation candidate genes . . . . . | 18 |
| 15      | PCA based on filtered dataset. . . . .                                                                                                                    | 18 |
| 16      | Comparison of linear model and linear mixed model results of the genotype by phenotype<br>( $G \times P$ ) association. . . . .                           | 19 |
| 17      | Extended close-up on the four intervals above the 99.98th $F_{ST}$ percentile . . . . .                                                                   | 20 |

## List of Supplementary Tables

|    |                                                                             |    |
|----|-----------------------------------------------------------------------------|----|
| 1  | Genomic regions above the 99.90 <sup>th</sup> $F_{ST}$ percentile . . . . . | 21 |
| 2  | Software versions used in this study . . . . .                              | 22 |
| 3a | Sample list for re-sequencing . . . . .                                     | 23 |
| 3b | Sample list for re-sequencing . . . . .                                     | 24 |
| 3c | Sample list for re-sequencing . . . . .                                     | 25 |
| 4  | Sequencing data generated for the assembly . . . . .                        | 25 |
| 5  | Sample list for RNA sequencing . . . . .                                    | 26 |
| 6  | Global estimates of the weighted mean $F_{ST}$ . . . . .                    | 26 |
| 7  | Anchoring statistics . . . . .                                              | 26 |



# Supplementary Information

## Supplementary Figures

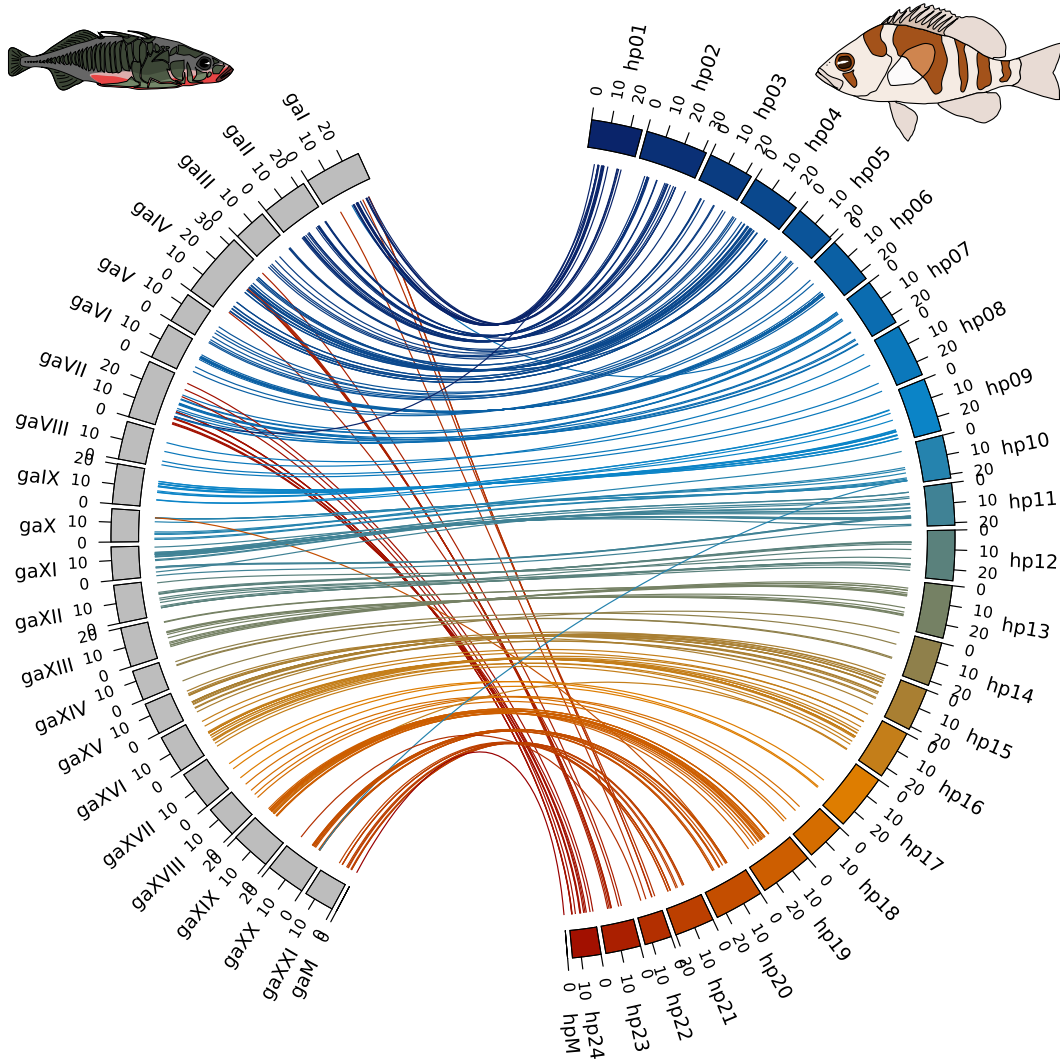

**Supplementary Figure 1: Broad-scale synteny between the hamlet and stickleback genomes.** The comparison is based on a whole-genome alignment using last. Only alignments > 5000 bp are shown. Left: stickleback (*Gasterosteus aculeatus*, 21 LGs & mitochondria). Right: hamlet (*Hypoplectrus puella*, 24 LGs & mitochondria).



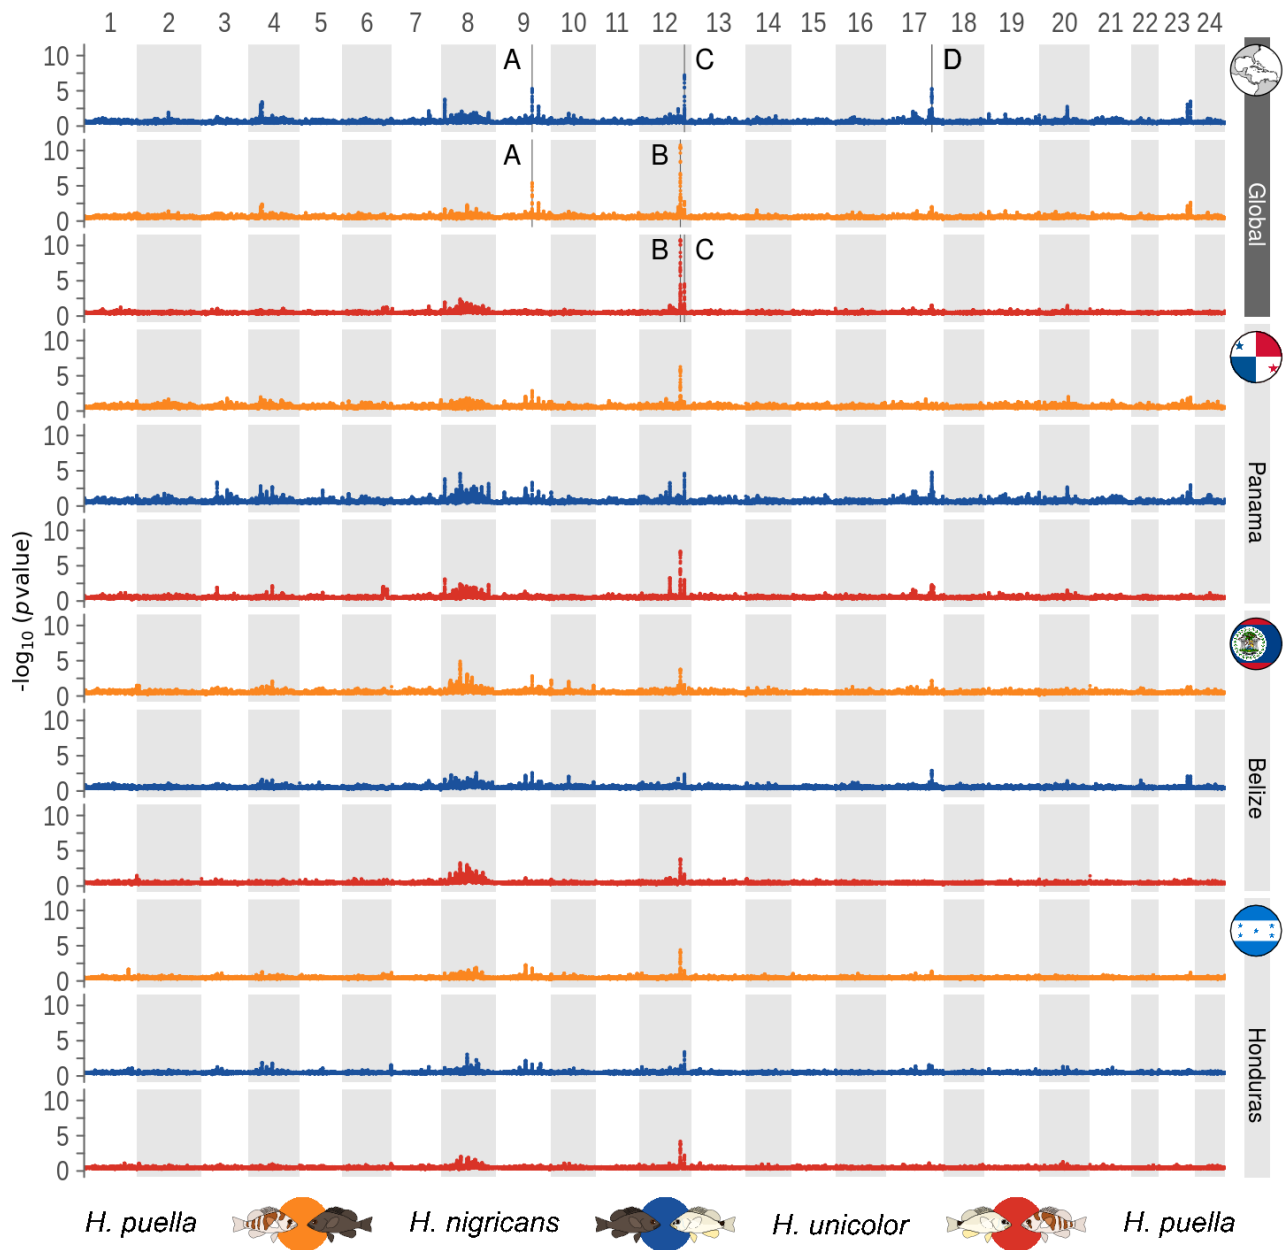

**Supplementary Figure 3: Genotype by phenotype ( $G \times P$ ) association among black (*H. nigricans*), barred (*H. puella*) and butter (*H. unicolor*) hamlets.** Each species pair is represented by one colour, pooled across locations (Global) as well as within each location (Belize, Honduras & Panama). The  $p$  values are from the linear model with Wald test, transformed using the negative of the common logarithm and averaged across 50 kb window with 5 kb increments ( $-\log_{10}(p)$ ). The four genomic regions highlighted with a vertical line, included as reference, correspond to the four intervals identified in Fig. 2.

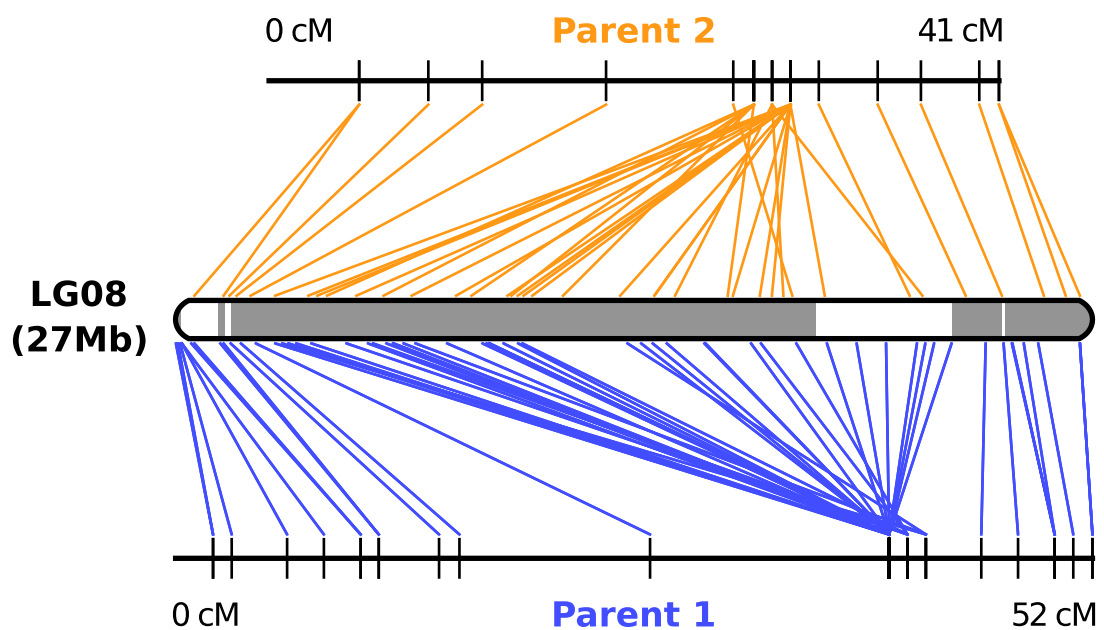

**Supplementary Figure 4: Large low-recombining region on linkage group 08 (LG08).** Top and bottom: linkage maps of the two parents used for the  $F_1$  cross, from<sup>26</sup>. Middle: assembled linkage group 08. Lines connect individual RAD markers that are identified in both the linkage maps and the assembly. Gray and white blocks represent individual scaffolds. A large number of RAD markers that are in close proximity on the linkage maps are distributed over a wide region on the assembled linkage group, providing direct evidence of low recombination in this region.

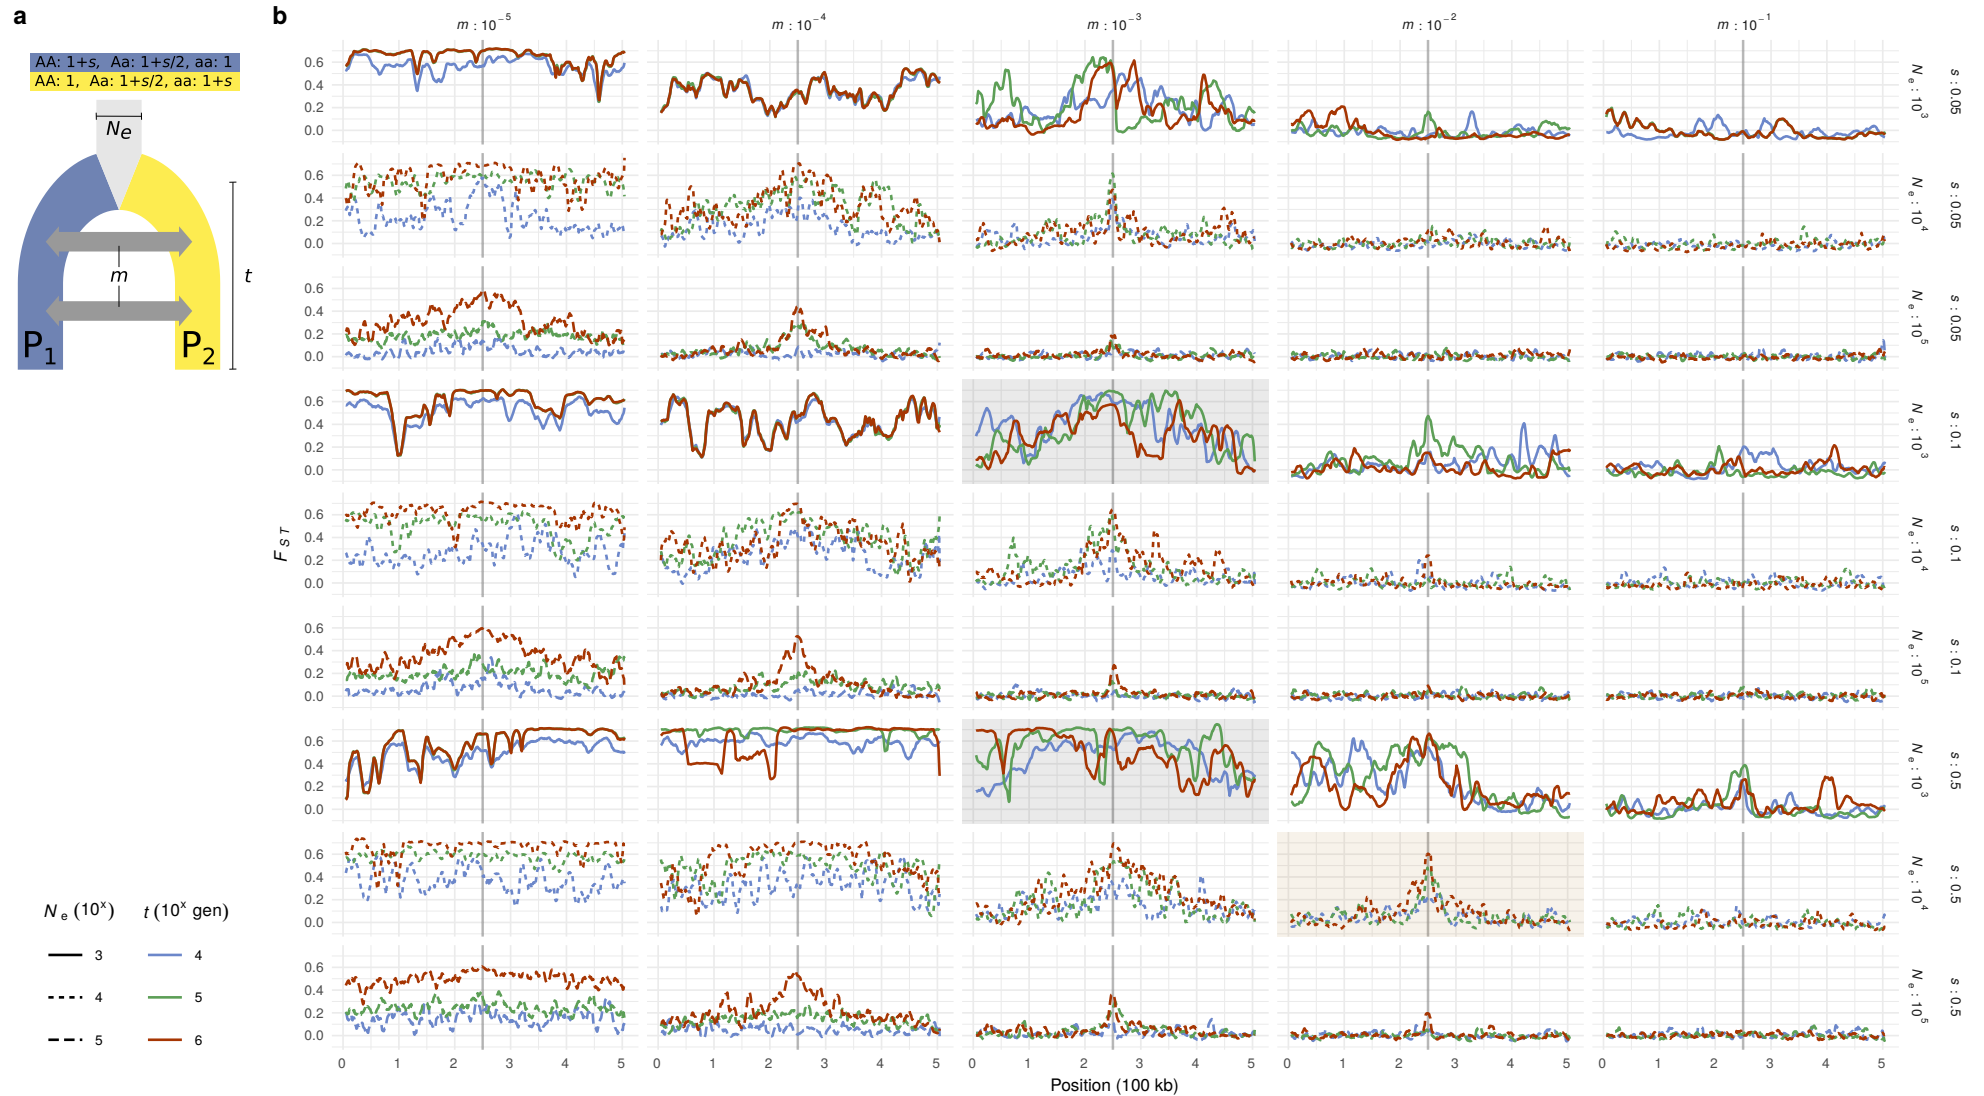

**Supplementary Figure 5: Extent of differentiation under various simulated scenarios.** The demographic history underlying the simulations consisted of two populations (1 & 2) of constant size  $N_e$  that split  $t$  generations ago and experienced constant and symmetrical migration ( $m$ ) since then. A selected site was considered in the middle of a 500-kb chromosome, consisting of a codominant locus with two alleles A and a that are advantageous in population 1 and 2, respectively, with a fitness of  $1+s$  for homozygotes and  $1+s/2$  for heterozygotes where  $s$  is the selection coefficient. Scenarios highlighted in grey are similar to those explored by Charlesworth *et al.*<sup>143</sup>. Patterns similar to the ones observed in this study (highlighted in orange) were obtained with larger  $N_e$  (10,000) and higher  $m$  (0.01), which we suggest may be more representative of the situation in the hamlets.

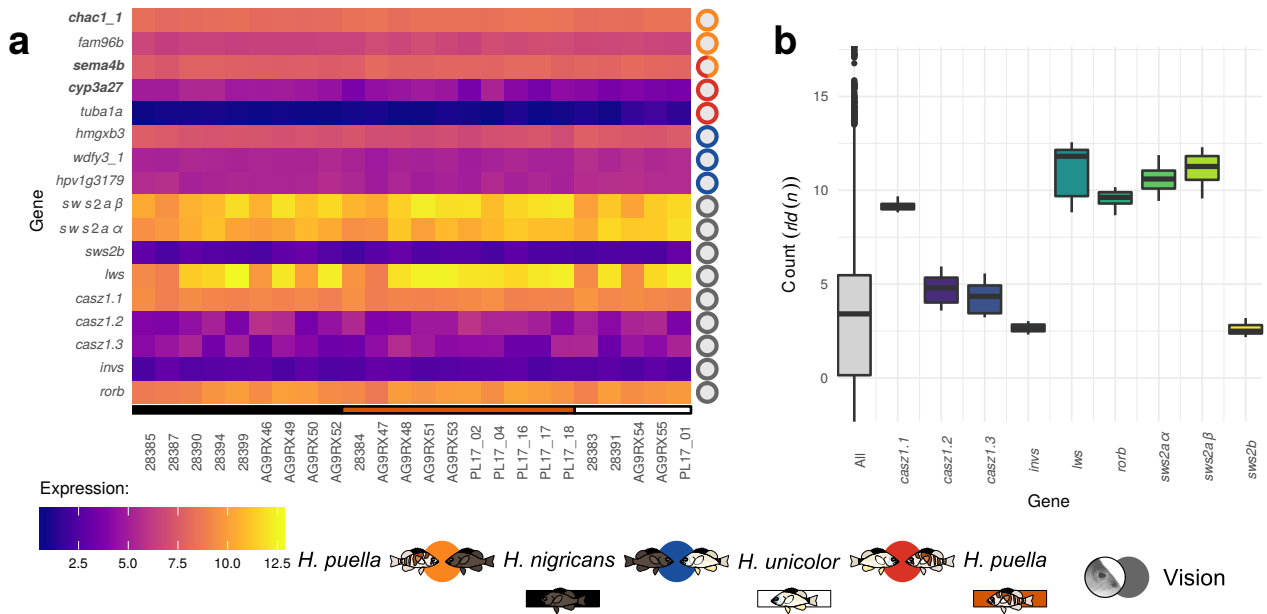

**Supplementary Figure 6: Gene expression in the retinal tissue.** **a**, only three genes, highlighted in bold, were significantly differentially expressed among species. Genes included in the figure correspond, from top to bottom, to the three most differentially expressed genes for each species pair (labelled by the colour-coded rings on the right) followed by the candidate genes related to vision identified in this study (grey rings, not differentially expressed). Data from 10 adult barred, 9 black and 5 butter hamlets from Panama (labelled by the colour bar on the bottom). **b**, albeit not differentially expressed, many of the candidate genes showed consistent above-average expression levels. Expression data transformed with regularised logarithm in both panels.

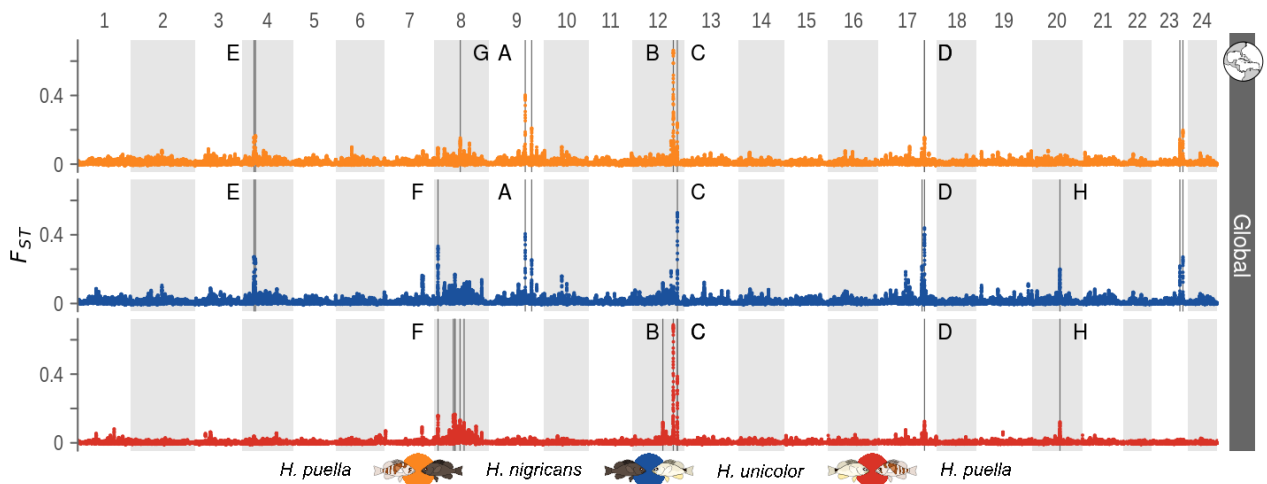

**Supplementary Figure 7: Genomic intervals above the 99.90th  $F_{ST}$  percentile.**  $F_{ST}$  values were estimated as the weighted mean per 50 kb window with 5 kb increments, considering all locations for each species. A total of 19 genomic intervals above the 99.90<sup>th</sup>  $F_{ST}$  percentile, highlighted with a vertical bar, were identified (Suppl. Tab. 1). Intervals containing candidate genes are labelled with capital letters. Peaks A – D are also above the 99.98<sup>th</sup>  $F_{ST}$  percentile, peaks E – H are not.

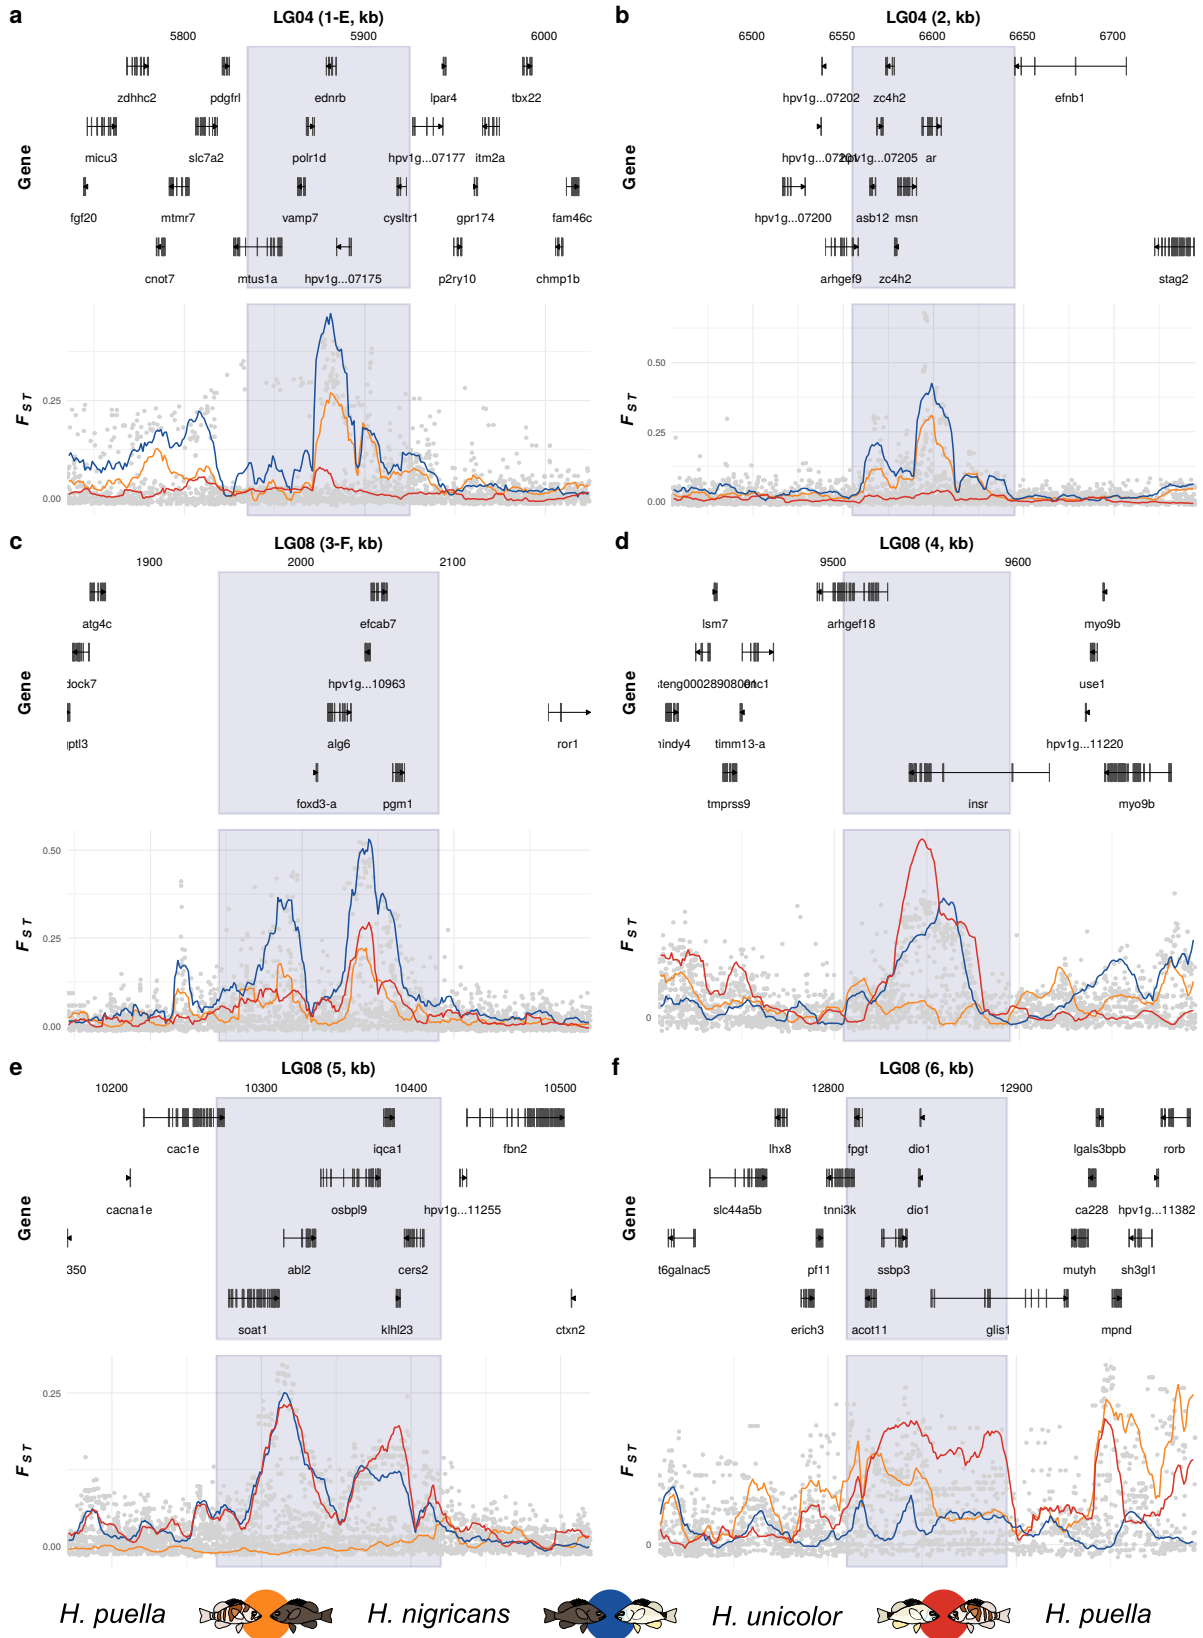

**Supplementary Figure 8 (I):** Close-up on all the intervals above the 99.90<sup>th</sup>  $F_{ST}$  percentile. The panels (a-r, figure continued below) correspond to the 18 intervals above the 99.90<sup>th</sup>  $F_{ST}$  percentile. From top to bottom, each panel includes the respective linkage group (LG) and interval ID, the position on the LG, the gene model annotation and  $F_{ST}$  values. Gene models include the extent and direction of genes as well as exon boundaries. The  $F_{ST}$  plots show the pairwise comparisons among species (lines, weighted mean per 10 kb window with 1 kb increments). Additionally, the global  $F_{ST}$  values among the three species are shown as dots on a SNP basis. All comparisons with species samples pooled across the three locations. The highlighted area corresponds to the whole intervals as defined in Suppl. Tab. 1



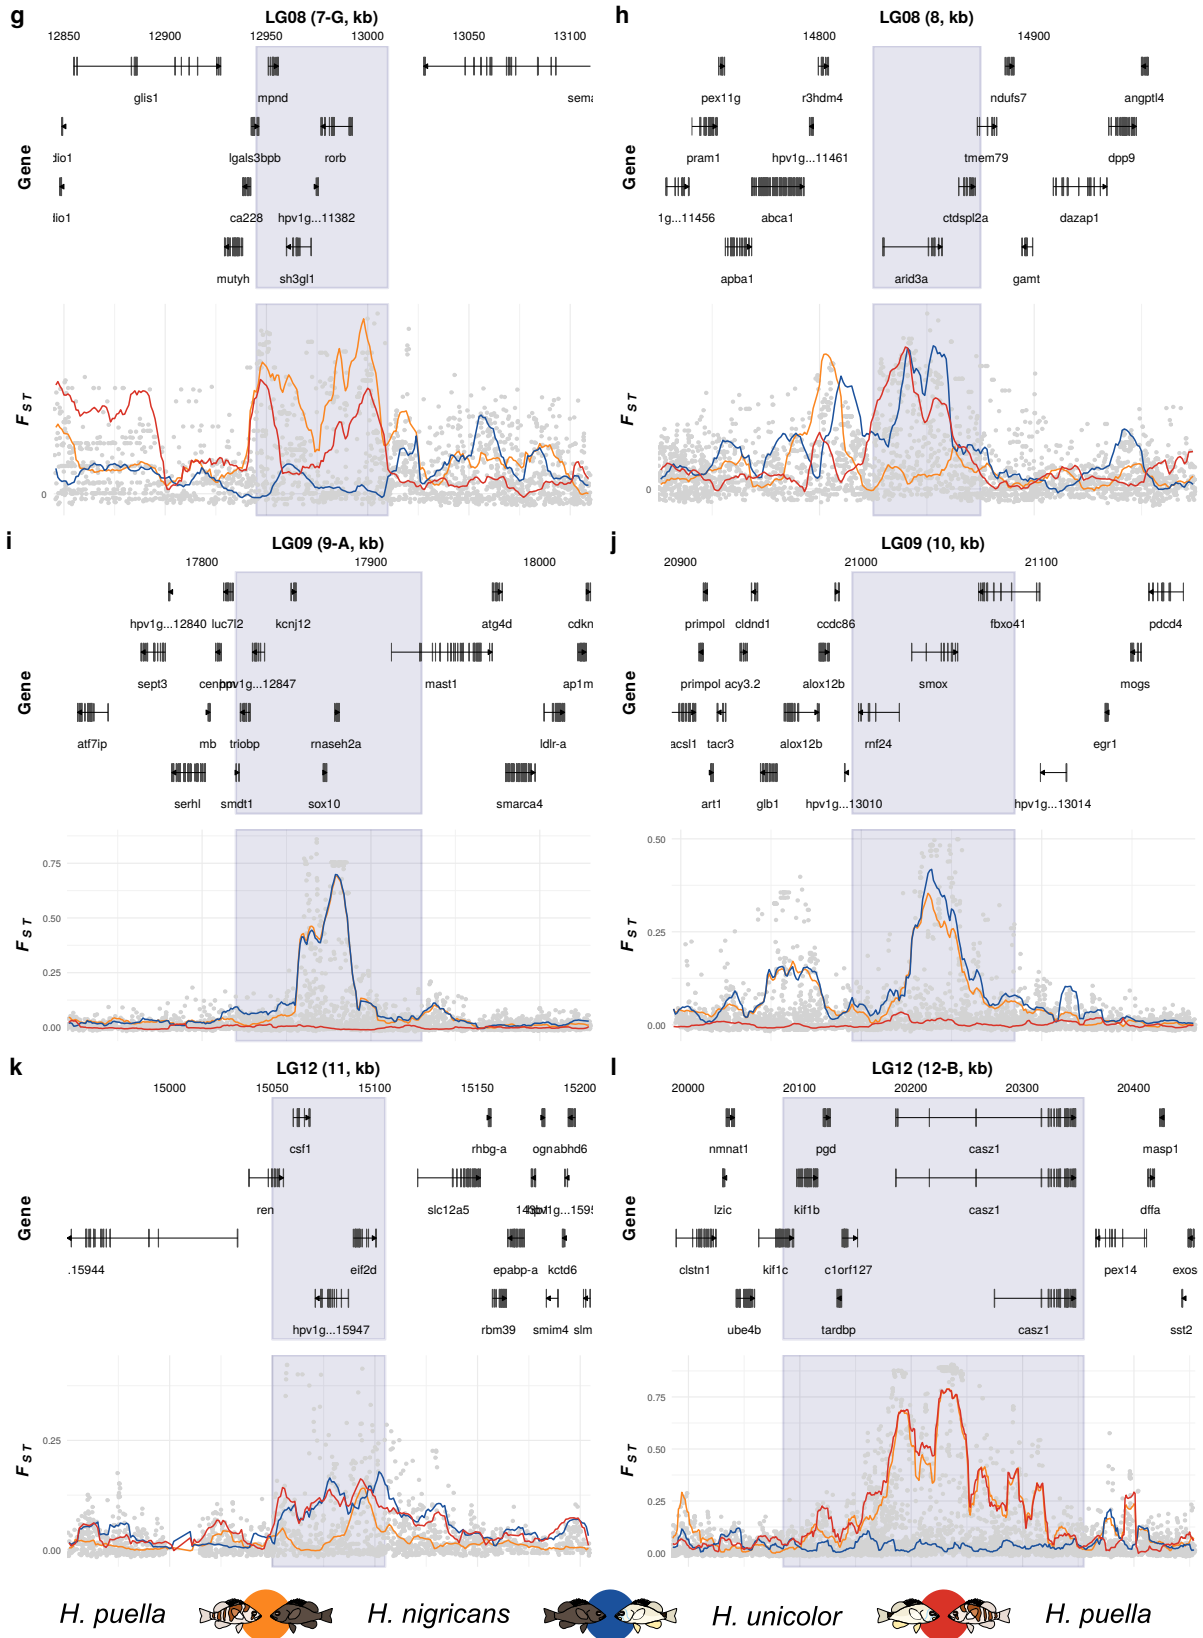

**Supplementary Figure 8 (II):** Close-up on all the intervals above the 99.90<sup>th</sup>  $F_{ST}$  percentile. The panels (a-r, figure continued below) correspond to the 18 intervals above the 99.90<sup>th</sup>  $F_{ST}$  percentile. From top to bottom, each panel includes the respective linkage group (LG) and interval ID, the position on the LG, the gene model annotation and  $F_{ST}$  values. Gene models include the extent and direction of genes as well as exon boundaries. The  $F_{ST}$  plots show the pairwise comparisons among species (lines, weighted mean per 10 kb window with 1 kb increments). Additionally, the global  $F_{ST}$  values among the three species are shown as dots on a SNP basis. All comparisons with species samples pooled across the three locations. The highlighted area corresponds to the whole intervals as defined in Suppl. Tab. 1



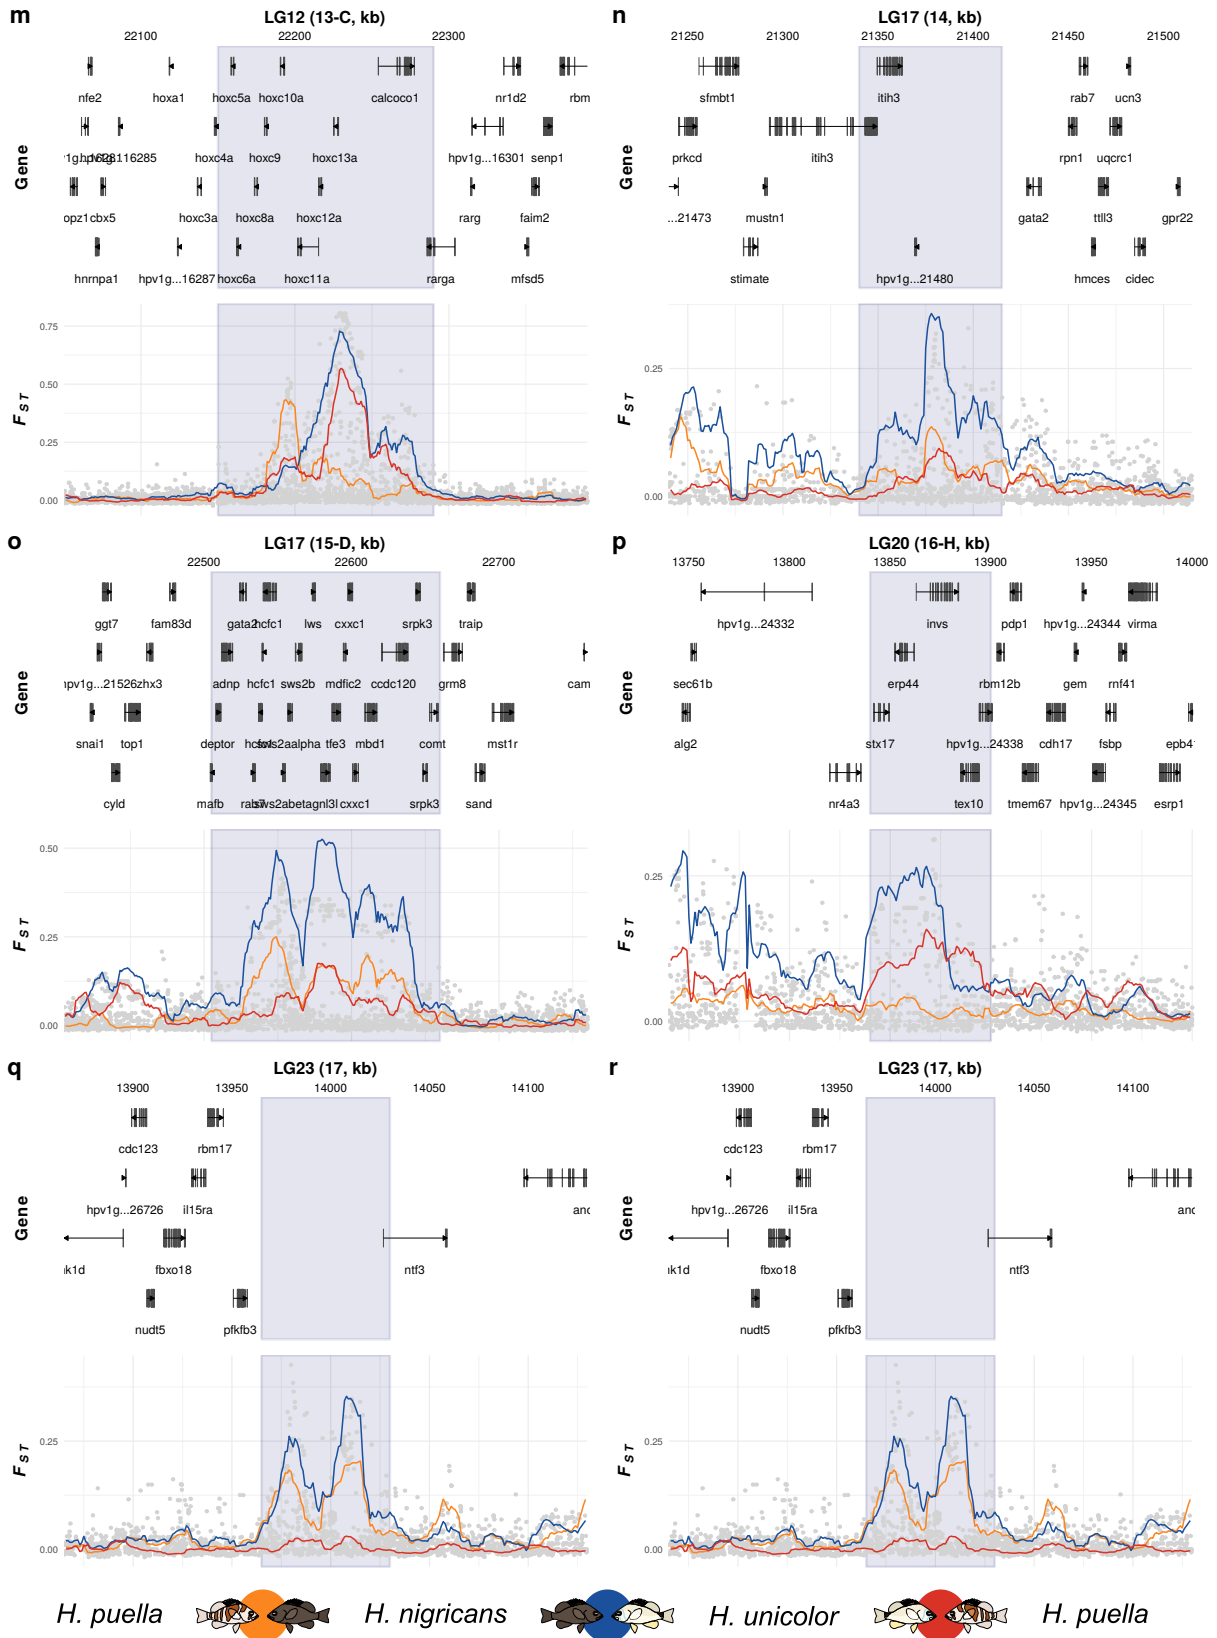

**Supplementary Figure 8 (III): Close-up on all the intervals above the 99.90th  $F_{ST}$  percentile** The panels (a-r) correspond to the 18 intervals above the 99.90<sup>th</sup>  $F_{ST}$  percentile. From top to bottom, each panel includes the respective linkage group (LG) and interval ID, the position on the LG, the gene model annotation and  $F_{ST}$  values. Gene models include the extent and direction of genes as well as exon boundaries. The  $F_{ST}$  plots show the pairwise comparisons among species (lines, weighted mean per 10 kb window with 1 kb increments). Additionally, the global  $F_{ST}$  values among the three species are shown as dots on a SNP basis. All comparisons with species samples pooled across the three locations. The highlighted area corresponds to the whole intervals as defined in Suppl. Tab. 1

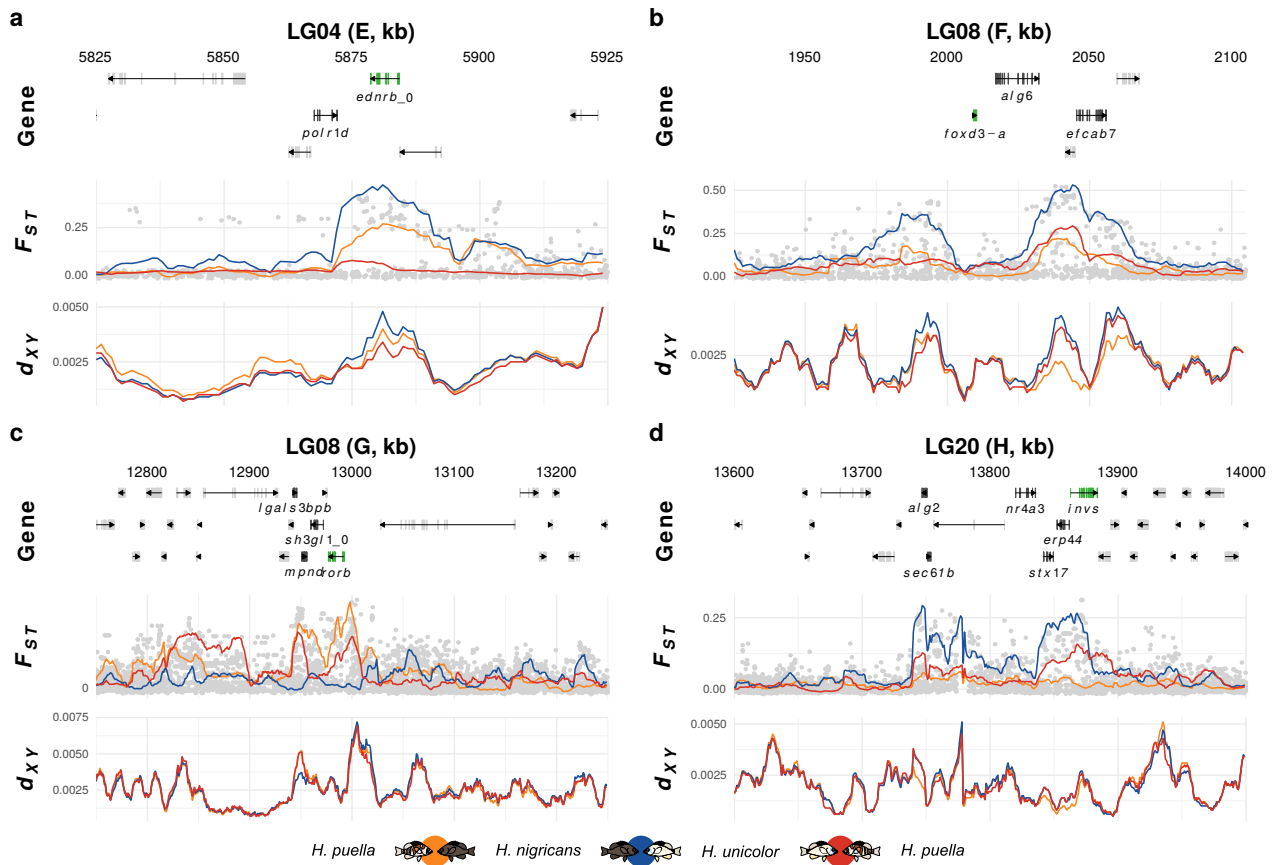

**Supplementary Figure 9: Close-up on the four additional intervals containing candidate vision and pigmentation genes.** The four panels (a-d) correspond to the four additional intervals above the 99.90<sup>th</sup>  $F_{ST}$  percentile (but not above the 99.98<sup>th</sup>) that include candidate vision and pigmentation genes. From top to bottom, each panel includes the respective linkage group (LG), the position on the LG, the gene model annotation,  $F_{ST}$  and  $d_{XY}$ . Gene models include the extent and direction of genes as well as exon boundaries. For clarity only the genes in high  $F_{ST}$  intervals are labelled, and candidate genes are highlighted in green. The  $F_{ST}$  plots show the pairwise comparisons among species (lines, weighted mean per 10 kb window with 1 kb increments). Additionally, the global  $F_{ST}$  values among the three species are shown as dots on a SNP basis. The  $d_{XY}$  values are also averaged over 10 kb windows with 1 kb increments. All comparisons with species samples pooled across the three locations.

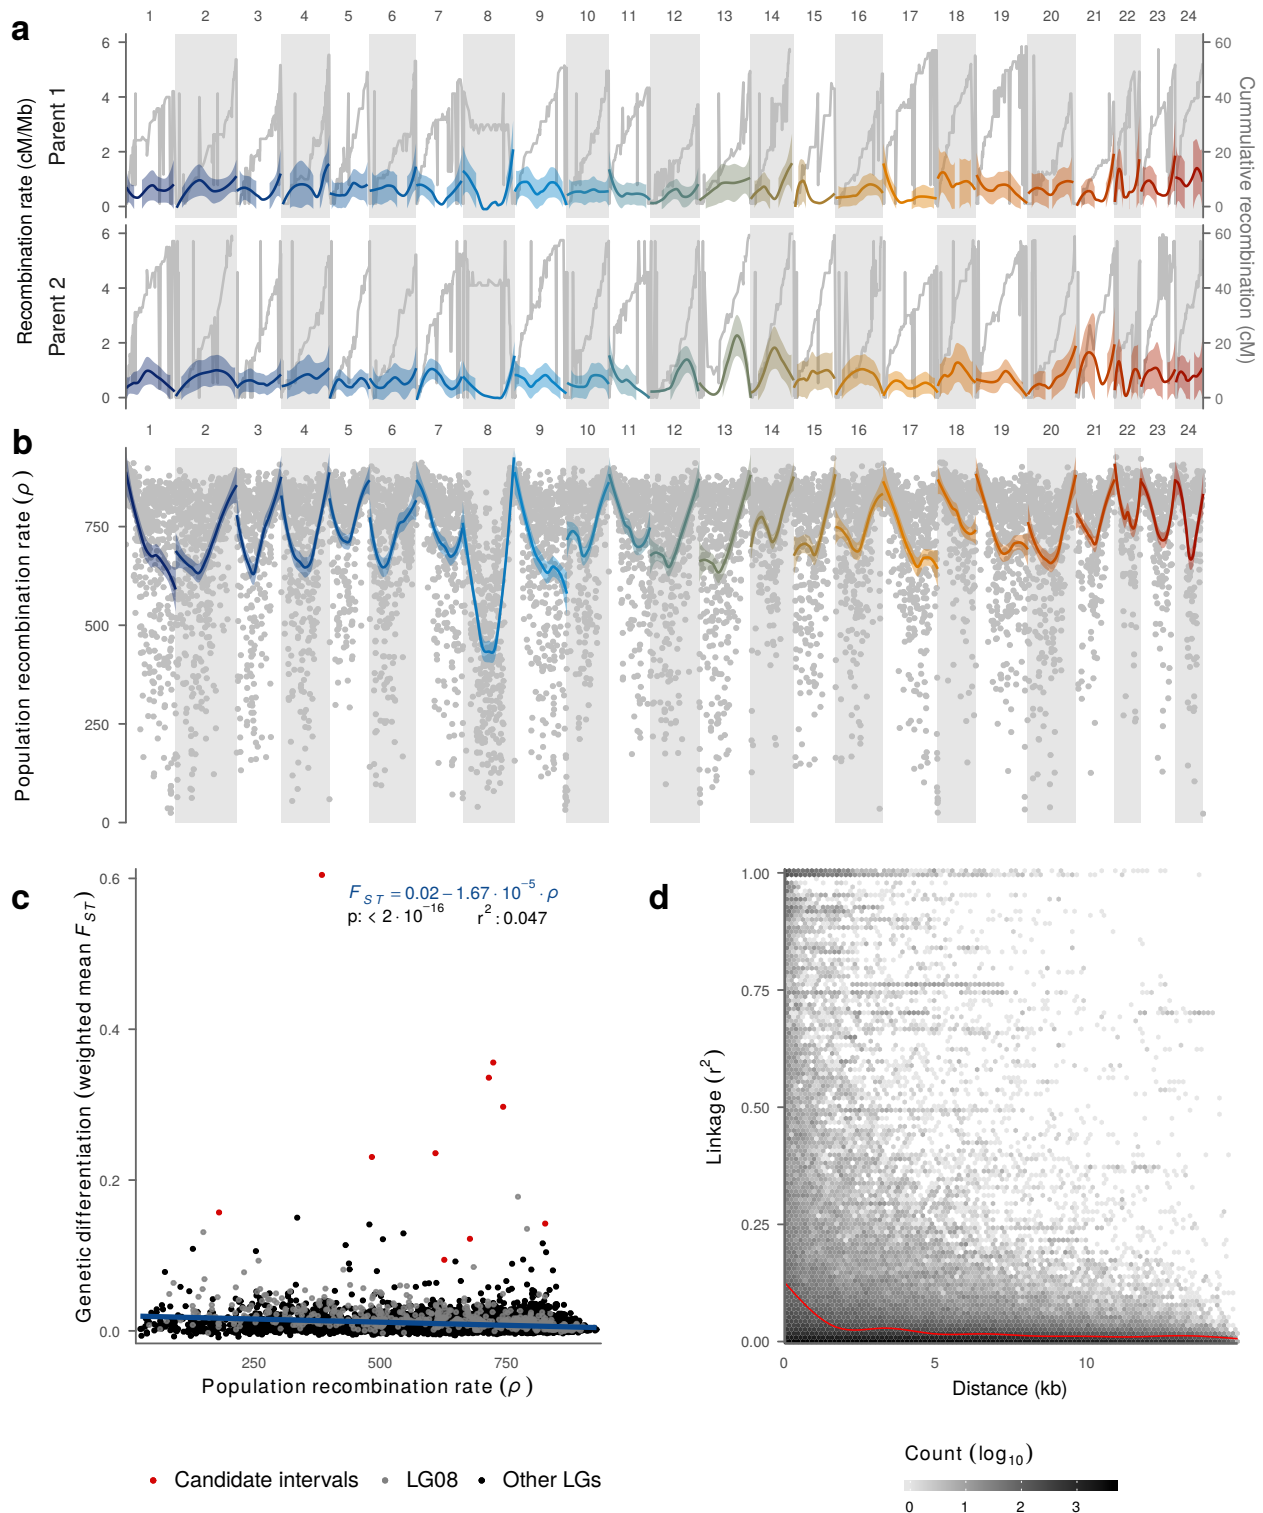

**Supplementary Figure 10: Genome-wide recombination patterns.** **a**, recombination landscape inferred from the combination of a within-species cross and the genome assembly. Recombination rate was inferred by mapping the linkage map<sup>26</sup> markers onto the genome assembly and dividing linkage (cM) by physical distance (Mb). **b**, recombination landscape inferred from population genomic data considering all species and locations. As expected due to the different data sets considered, the two types of recombination maps differ substantially. Yet both identify a large low-recombining region in LG08. **c**, correlation between population recombination rate and genetic differentiation among the three species considering non-overlapping 50-kb windows. As expected, a negative relationship is observed. The correlation and regression slope are nevertheless weak, indicating that recombination does not have a strong impact on differentiation at this stage of genomic divergence. Red dots correspond to the 50 kb windows that are within our four candidate regions; these windows do not show particularly low recombination rates. **d**, decay in linkage disequilibrium with physical distance, estimated over 20 randomly placed 15 kb windows. The shading of the hexagonal bins indicates the  $\log_{10}$  count for each combination of distance and  $r^2$  values. The red lines indicates a smoothing spline (gam, cubic regression spline) of the original data. Physical linkage decays rapidly within 2 kb.

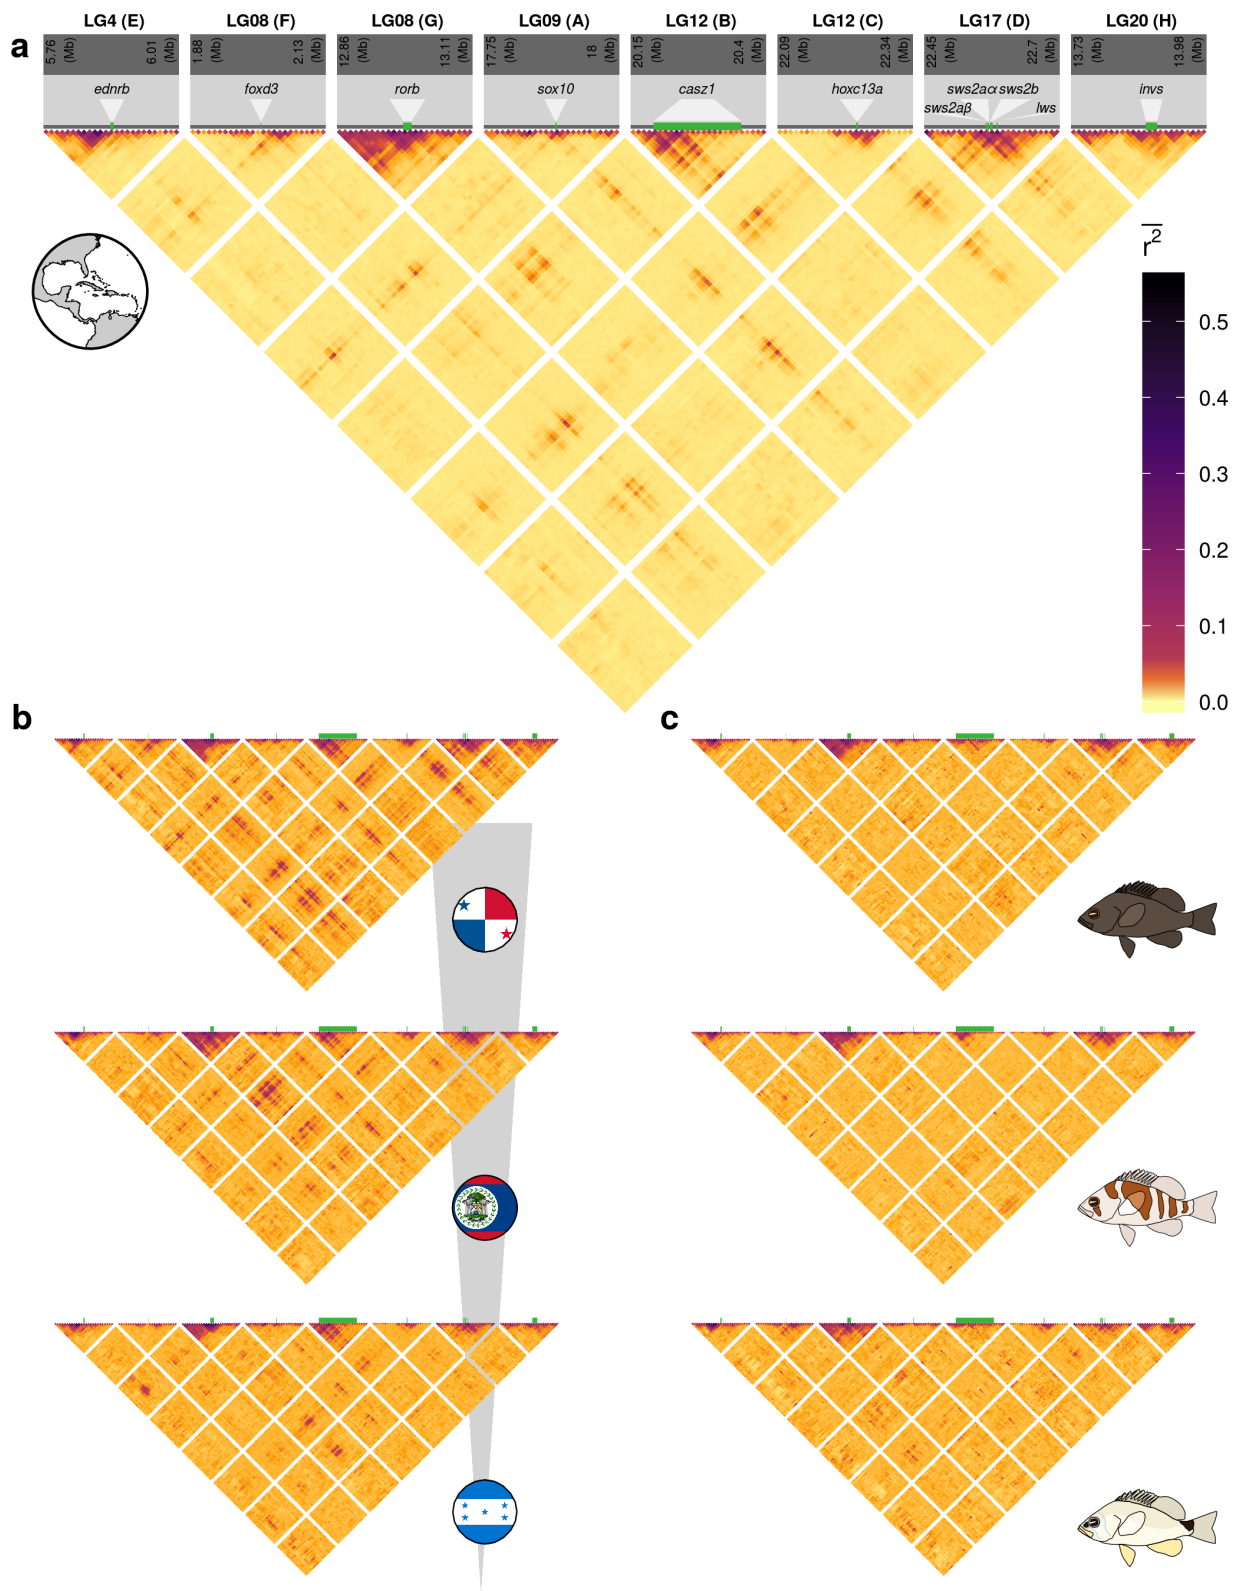

**Supplementary Figure 11: Long-distance and inter-chromosomal linkage disequilibrium (LD) among the eight intervals containing candidate vision and pigmentation genes.** a, the intervals identified in Fig. 2 & Suppl. Fig. 7 displayed increased long-distance and inter-chromosomal LD. LD was calculated between individual SNP pairs and averaged over 10 kb × 10 kb areas. b, LD among the eight intervals ordered by increasing differentiation among the three species (indicated by gray gradient, Fig. 1b,c, Suppl. Tab. 6). c, in contrast, LD was very low or absent within each of the three species.

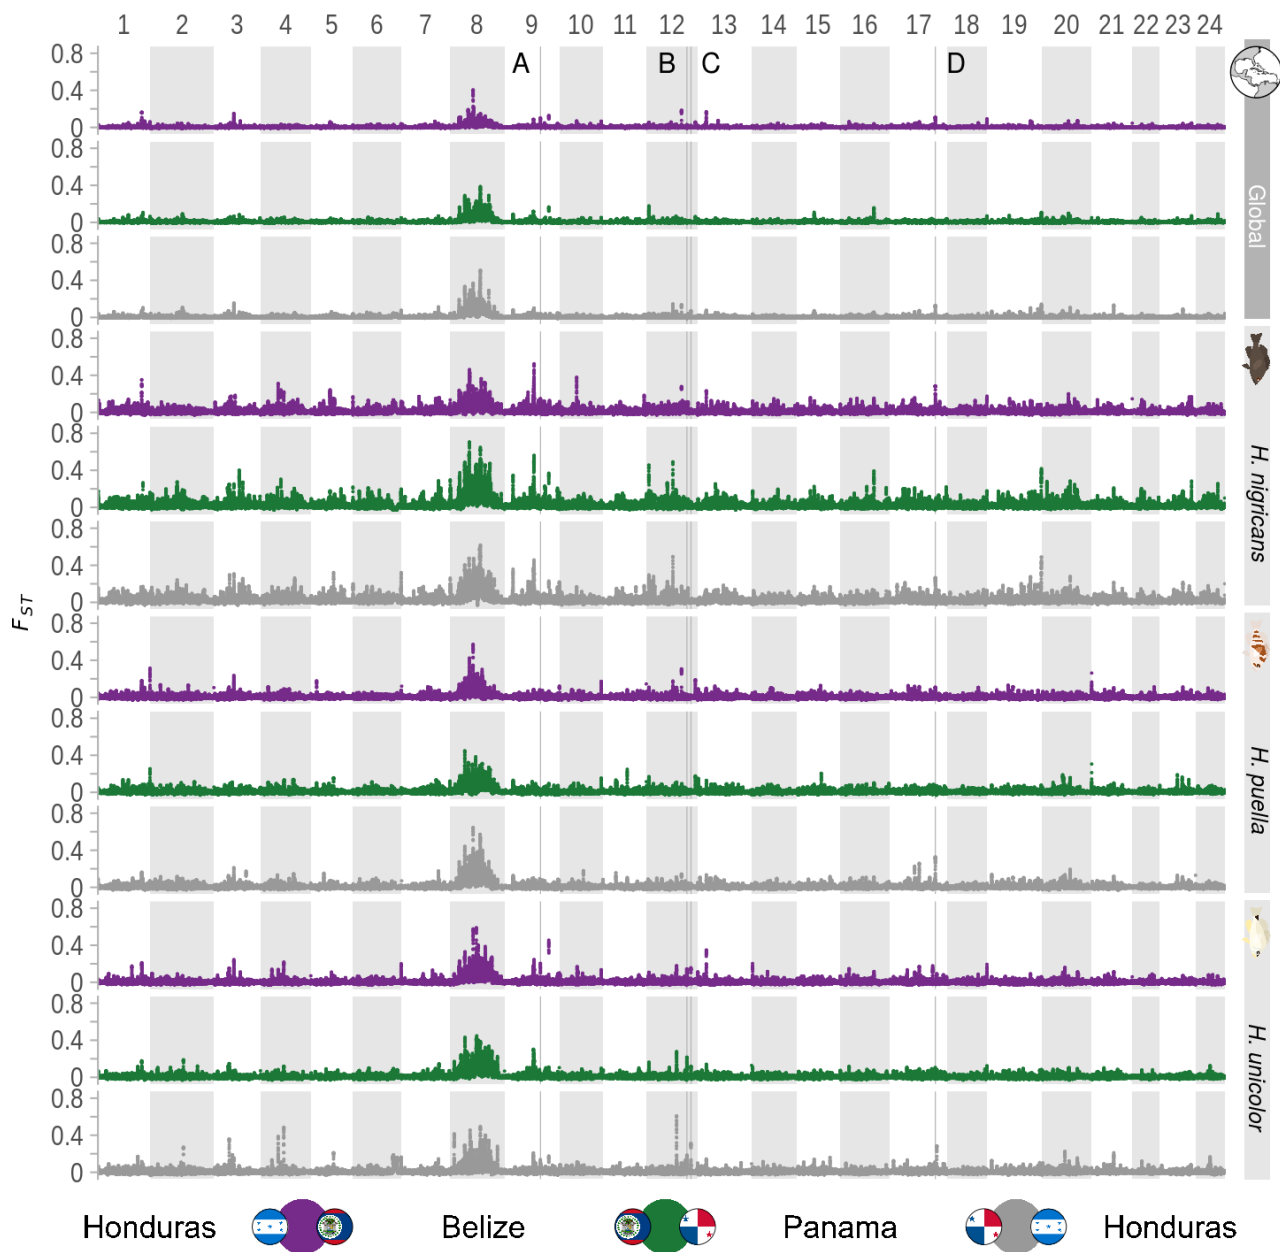

**Supplementary Figure 12: Patterns of genomic differentiation among hamlets from Belize, Honduras and Panama.** The alternating white and grey blocks represent the 24 linkage groups (LGs). Each population comparison is represented by one colour, pooled across species (Global) as well as within each species (*H. nigricans*, *H. puella* & *H. unicolor*).  $F_{ST}$  values were estimated as the weighted mean per 50 kb window with 5 kb increments. The four genomic regions highlighted with a vertical line, included as reference, correspond to the four intervals identified in Fig. 2.



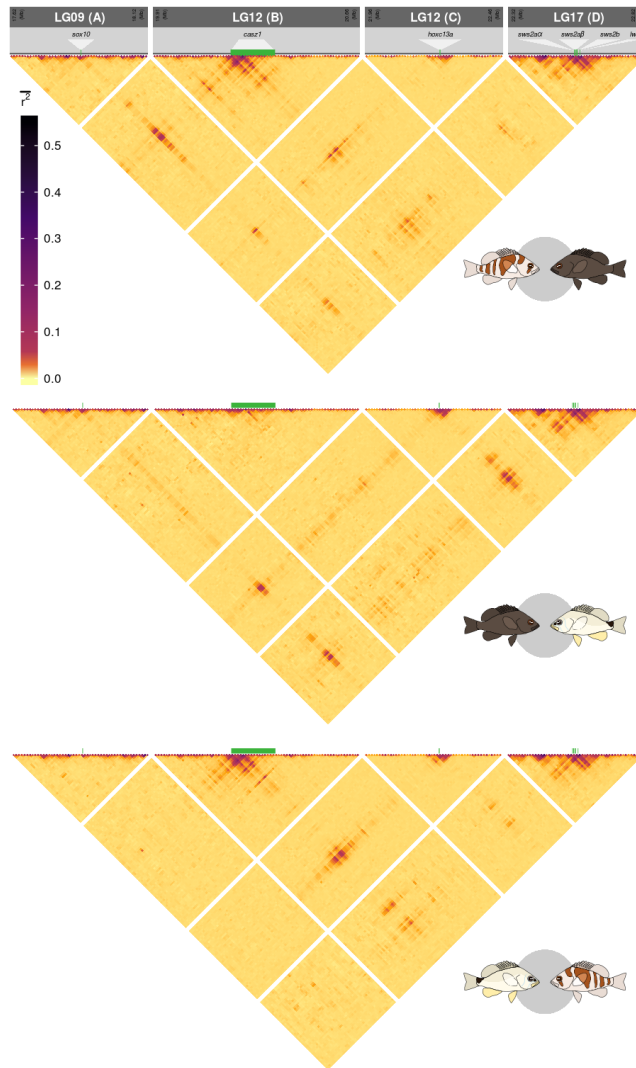

**Supplementary Figure 13: Long-distance and inter-chromosomal linkage disequilibrium (LD) among the four candidate intervals for each species pair.** The intervals identified in Fig. 2 displayed increased long-distance and inter-chromosomal LD, yet different pairs of intervals were in LD in each species pair. LD calculated between individual SNP pairs and averaged over  $10 \text{ kb} \times 10 \text{ kb}$  areas.

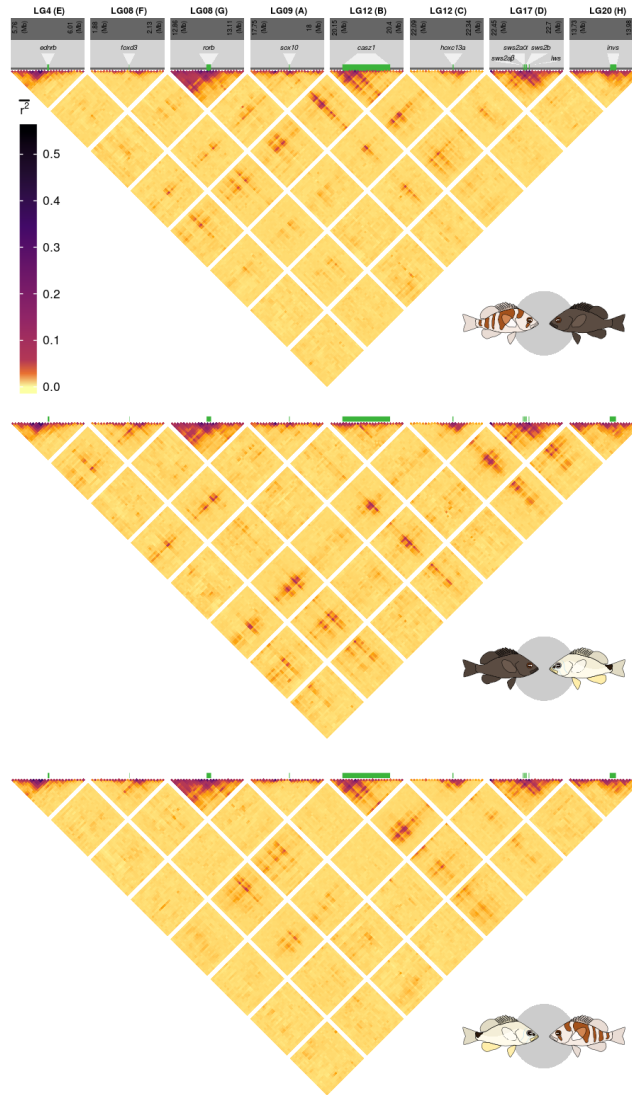

**Supplementary Figure 14: Long-distance and inter-chromosomal linkage disequilibrium (LD) among the eight intervals containing vision and pigmentation candidate genes.** The intervals identified in & Suppl. Fig. 7 displayed increased long-distance and inter-chromosomal LD, yet different pairs of genes were in LD in each species pair. LD was calculated between individual SNP pairs and averaged over 10 kb × 10 kb areas.

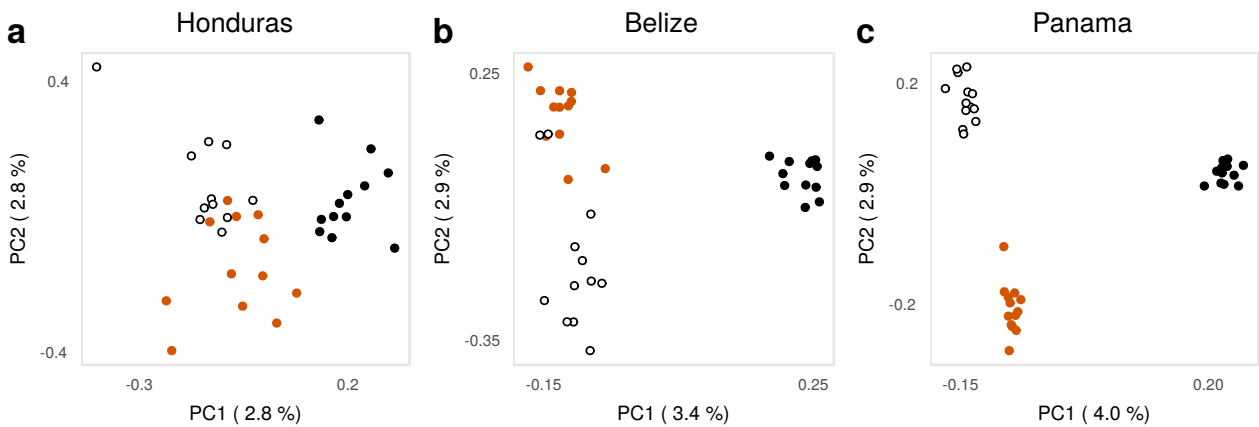

**Supplementary Figure 15: PCA based on filtered data set.** Principal Component Analysis (PCA) within each location. Genomic data was filtered for a minimum distance of 25 kb between SNPs to rule out physical linkage. After filtration 22,266 SNPs (0.3%) of the original data set remained.

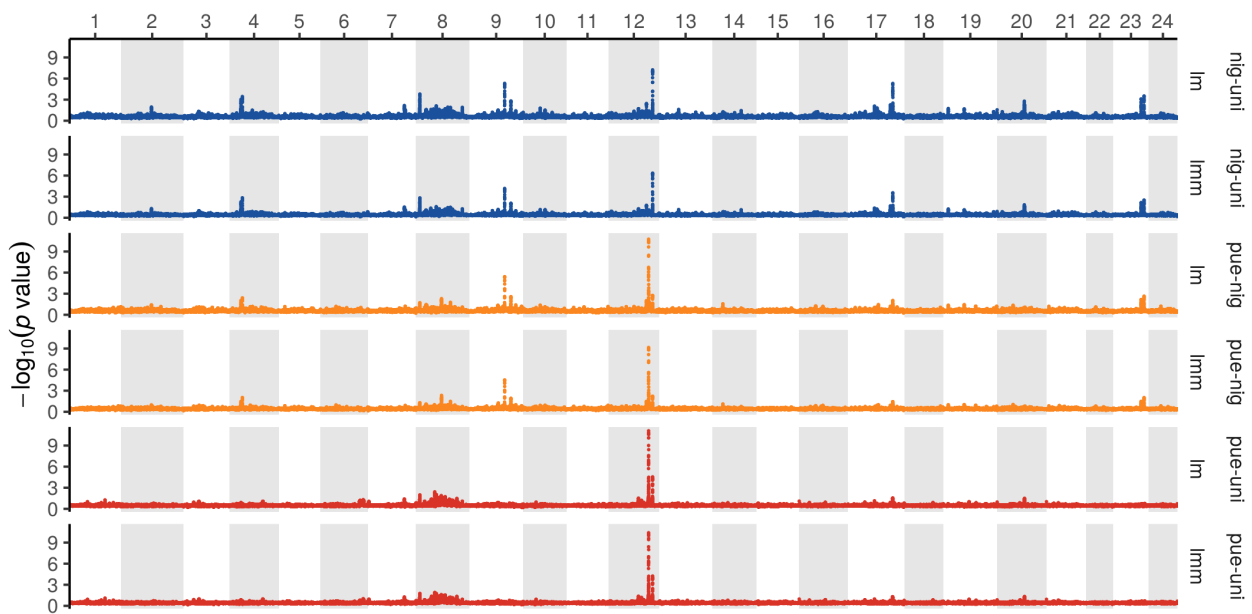

**Supplementary Figure 16: Comparison of linear model and linear mixed model results of the genotype by phenotype ( $G \times P$ ) association among black (*H. nigricans*), barred (*H. puella*) and butter (*H. unicolor*) hamlets.** Each species pair is represented by one colour, pooled across locations. Species comparisons are indicated on the right as well as model type (lm: linear model; lmm: linear mixed model). The  $p$  values are from the linear model with Wald test, transformed using the negative of the common logarithm and averaged across 50 kb window with 5 kb increments ( $-\log_{10}(p)$ ).



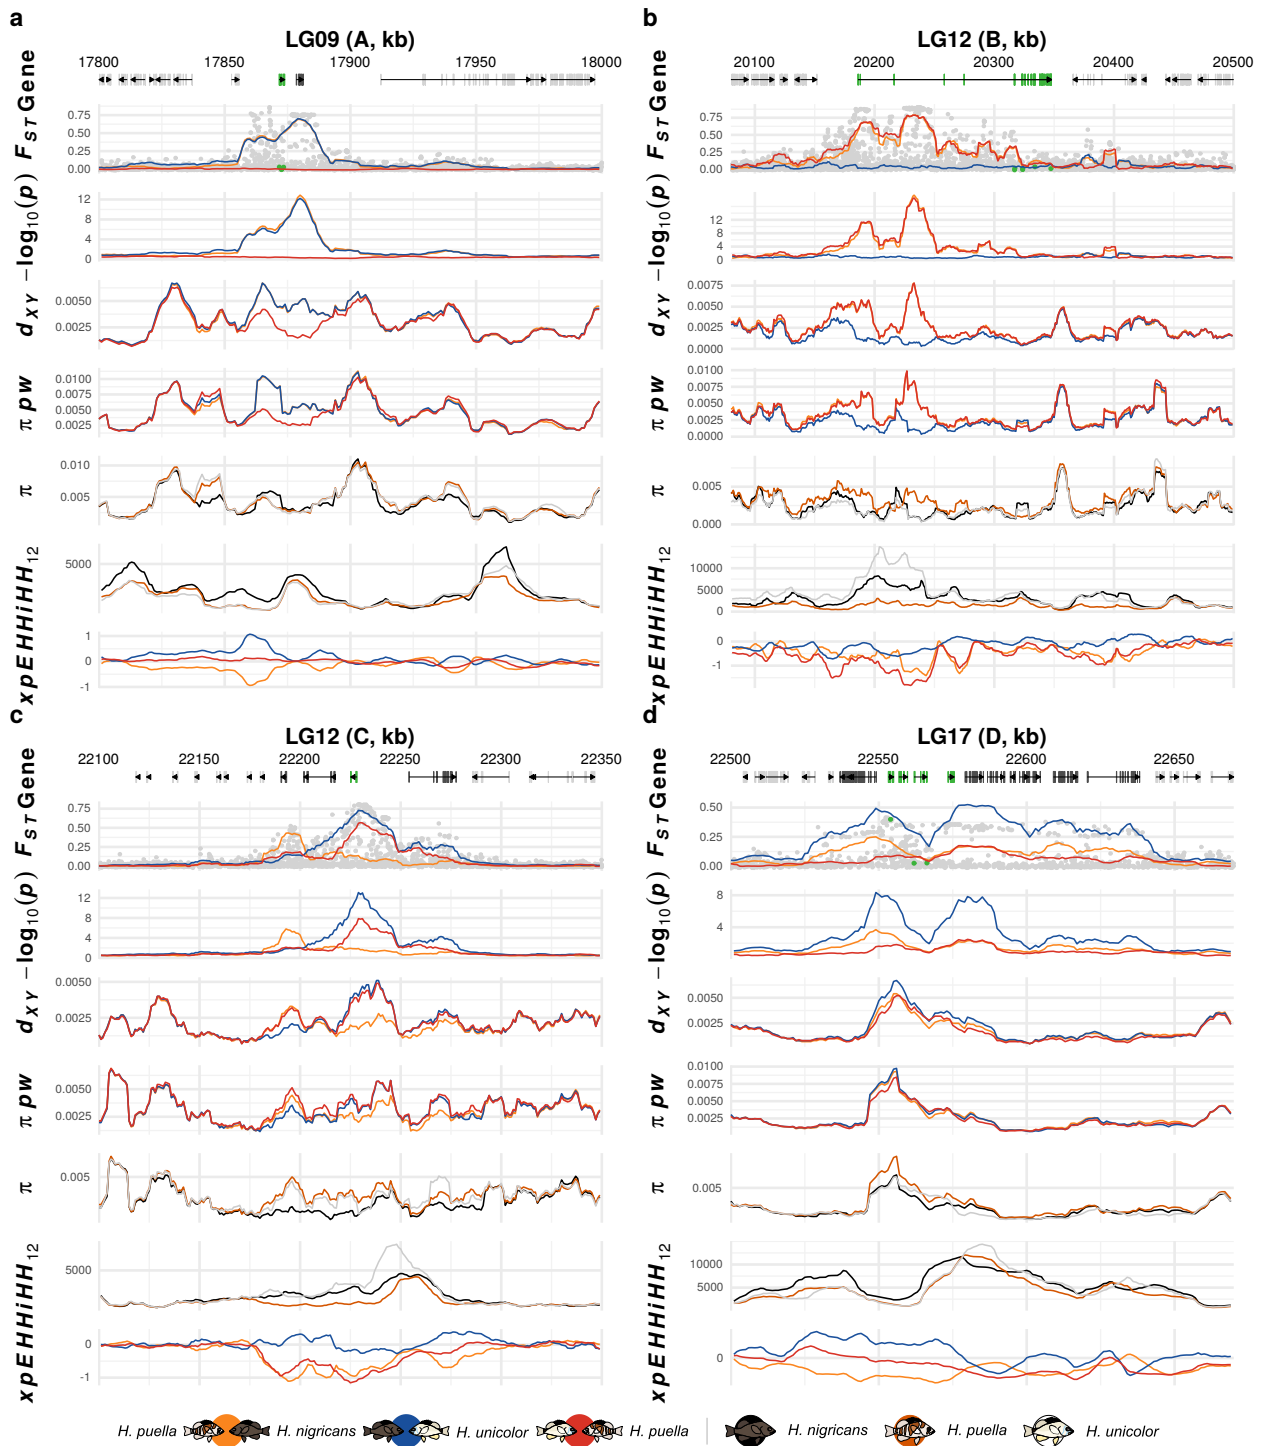

**Supplementary Figure 17: Extended close-up on the four intervals above the 99.98th  $F_{ST}$  percentile.** The four panels (a-d) correspond to the four intervals above the 99.98<sup>th</sup>  $F_{ST}$  percentile identified in Fig. 2 (A-D). From top to bottom, each panel includes the respective linkage group (LG), the position on the LG, the position of genes,  $F_{ST}$ , the  $-\log_{10}(p)$  value from the  $G \times P$  association,  $d_{XY}$ ,  $\pi$  (per species and species pair),  $iHH_{12}$  and  $xpEHH$  values. Candidate genes are highlighted in high green. All statistics show the pairwise comparisons among species (lines, averaged per 10 kb window with 1 kb increments). On the  $F_{ST}$  track, the global  $F_{ST}$  values among the three species are shown as dots on a SNP basis. Non-synonymous SNPs in candidate genes are highlighted in green. All comparisons with species samples pooled across the three locations.

## Supplementary Tables

**Supplementary Table 1:** Genomic regions above the 99.90<sup>th</sup>  $F_{ST}$  percentile, based on sliding window analysis with 50 kb windows and 5 kb increments. The Comparison column refers to the specific pairs in which the region is above the 99.90<sup>th</sup>  $F_{ST}$  percentile: *H. nigricans* vs. *H. puella* (NP), *H. nigricans* vs. *H. unicolor* (NU) & *H. puella* vs. *H. unicolor* (NP). Regions containing candidate genes are labelled with capital letters. Regions A – D are also above the 99.98<sup>th</sup>  $F_{ST}$  percentile. The **Other genes** column includes all genes overlapping with the 50-kb windows above the 99.90<sup>th</sup>  $F_{ST}$  percentile. Note that this approach conservatively includes genes situated before and after peaks of differentiation at a 10-kb window resolution (Suppl. Fig. 8).

| Nr | ID | LG | Start (kb) | End (kb) | Candidate genes                                                      | Other genes                                                                                           | Comparison |
|----|----|----|------------|----------|----------------------------------------------------------------------|-------------------------------------------------------------------------------------------------------|------------|
| 1  | E  | 04 | 5835       | 5925     | <i>ednrb</i>                                                         | <i>polr1d, hpv1g...7175, cysltr1, mtus1a, vamp7</i>                                                   | NP,NU      |
| 2  |    | 04 | 6555       | 6645     |                                                                      | <i>asb12, zc4h2, hpv1g...7205, msn, ar, arhgef9, efnb1</i>                                            | NP,NU      |
| 3  | F  | 08 | 1945       | 2090     | <i>foxd3</i>                                                         | <i>hpv1g...10963, alg6, efcab7, pgm1</i>                                                              | NU,PU      |
| 4  |    | 08 | 9505       | 9595     |                                                                      | <i>arhgef18, insr</i>                                                                                 | PU         |
| 5  |    | 08 | 10270      | 10420    |                                                                      | <i>klhl23, soat1, abl2, iqca1, cers2, cac1e, osbp19</i>                                               | PU         |
| 6  |    | 08 | 12810      | 12895    |                                                                      | <i>fpgt, acot11, dio1, tnni3k, ssbp3, glis1</i>                                                       | PU         |
| 7  | G  | 08 | 12945      | 13010    | <i>rorb</i>                                                          | <i>mpnd, sh3gl1, hpv1g...11382, lgals3bpb</i>                                                         | NP         |
| 8  |    | 08 | 14825      | 14875    |                                                                      | <i>ctdspd2a, arid3a, tmem79</i>                                                                       | PU         |
| 9  | A  | 09 | 17821      | 17930    | <i>sox10</i>                                                         | <i>smdt1, hpv1g...12847, kcnj12, rnaseh2a, mast1, triobp</i>                                          | NP,NU      |
| 10 |    | 09 | 20995      | 21085    |                                                                      | <i>rnf24, smox, fbxo41</i>                                                                            | NP,NU      |
| 11 |    | 12 | 15050      | 15105    |                                                                      | <i>csf1, ren, eif2d, hpv1g...15947</i>                                                                | PU         |
| 12 | B  | 12 | 20085      | 20355    | <i>casz1</i>                                                         | <i>pgd, c1orf127, kif1c, kif1b, tardbp</i>                                                            | NP,PU      |
| 13 | C  | 12 | 22150      | 22290    | <i>hoxc13a</i>                                                       | <i>hoxc5a, hoxc6a, hoxc8a, hoxc9, hoxc10a, hoxc11a, hoxc12a, calcoco1, rarga</i>                      | NP,NU,PU   |
| 14 |    | 17 | 21340      | 21415    |                                                                      | <i>itih3, hpv1g...21480</i>                                                                           | NU         |
| 15 | D  | 17 | 22505      | 22660    | <i>lws, sws2a<math>\beta</math>, sws2a<math>\alpha</math>, sws2b</i> | <i>mafb, deptor, adnp, rab7, hcfc1, gnl3l, tfe3, mdfic2, cxxc1, srpk3, comt, gata2, mbd1, ccdc120</i> | NP,NU,PU   |
| 16 | H  | 20 | 13840      | 13900    | <i>invs</i>                                                          | <i>hpv1g...24338, stx17, erp44, tex10</i>                                                             | NU,PU      |
| 17 |    | 23 | 13965      | 14030    |                                                                      | <i>ntf3</i>                                                                                           | NP,NU      |
| 18 |    | 23 | 15445      | 15530    |                                                                      | <i>crys, glipr1l1, ache, nxpe3, krr1, st3gal1, gp2</i>                                                | NP,NU      |

**Supplementary Table 2:** Software versions used in this study

| <b>Software</b> | <b>version</b>    | <b>Software</b>                          | <b>version</b>     | <b>Software</b> | <b>version</b>         |
|-----------------|-------------------|------------------------------------------|--------------------|-----------------|------------------------|
| Allmaps         | Version 1         | LAST                                     | 737                | proovread       | 2.13.13                |
| bedtools        | v2.27.1           | Maker                                    | v 3.0              | R               | 3.4.1 (calculations)   |
| Bowtie2         | version 2.3.4.1   | msa2vcf                                  |                    |                 | 3.4.3 (visualisations) |
| BUSCO           | 2                 | 98d97d07d6101fab1b0bef757b4ceee279e171d9 |                    | RepeatMasker    | Open-4.0.6             |
| BWA             | 0.7.12-r1044      | msms                                     | 3.2rc              | RepeatModler    | open-1-0-8             |
| Circos          | v 0.69            | MultiQC                                  | Version 0.8        | SAMtools        | 1.7                    |
| FastQC          | v0.11.3           | NextClip                                 | v1.3.1             | selscan         | v1.2.0a                |
| GATK            | v3.7-0-gcfedb67   | NextFlow                                 | 0.31.1             | SeqChunker      | v0.22.2                |
| GEMMA           | 0.97.2            | NewHybrids                               | 2.0+ Developmental | seq-gen         | 1.3.4                  |
| gffread         | v0.9.12           | PBJelly                                  | v14.1              | seqtk           | 1.2-r94                |
| HISAT2          | 2.0.4             | PGDSpider                                | 2.1.1.5            | SHAPEIT         | v2.r837                |
| Inkscape        | 0.91 r13725       | Picard Tools                             | 2.9.2-SNAPSHOT     | Trimmomatic     | 0.33                   |
| kallisto        | 0.43.1            | Platanus                                 | 1.2.4              | Trinity         | v2.2.0                 |
| Kraken          | 0.10.6-unreleased | plink                                    | v1.90b4 64-bit     | VCFtools        | 0.1.15                 |

Supplementary Table 3a: Samples used for resequencing (Samples 1-50).

| ID       | Species             | Location | Date       | Latitude | Longitude | Cov. | Acces. Nr. |
|----------|---------------------|----------|------------|----------|-----------|------|------------|
| 18151    | <i>H. nigricans</i> | Belize   | 2004-07-25 | 16.7653  | -088.1442 | 22.6 | ERS2619600 |
| 18153    | <i>H. nigricans</i> | Belize   | 2004-07-25 | 16.7653  | -088.1442 | 23.7 | ERS2619601 |
| 18155    | <i>H. nigricans</i> | Belize   | 2004-07-25 | 16.8008  | -088.0789 | 21.2 | ERS2619602 |
| 18156    | <i>H. nigricans</i> | Belize   | 2004-07-25 | 16.8008  | -088.0789 | 26.5 | ERS2619603 |
| 18157    | <i>H. nigricans</i> | Belize   | 2004-07-25 | 16.8008  | -088.0789 | 23.2 | ERS2619604 |
| 18158    | <i>H. nigricans</i> | Belize   | 2004-07-25 | 16.8008  | -088.0789 | 21.6 | ERS2619605 |
| 18159    | <i>H. nigricans</i> | Belize   | 2004-07-25 | 16.8008  | -088.0789 | 22.5 | ERS2619606 |
| 18162    | <i>H. nigricans</i> | Belize   | 2004-07-25 | 16.7653  | -088.1442 | 19.1 | ERS2619607 |
| 18165    | <i>H. nigricans</i> | Belize   | 2004-07-25 | 16.7653  | -088.1442 | 22.9 | ERS2619608 |
| 18171    | <i>H. nigricans</i> | Belize   | 2004-07-25 | 16.7653  | -088.1442 | 26.4 | ERS2619609 |
| 18185    | <i>H. nigricans</i> | Belize   | 2004-07-26 | 16.8058  | -088.0792 | 25.6 | ERS2619610 |
| 18187    | <i>H. nigricans</i> | Belize   | 2004-07-26 | 16.8058  | -088.0792 | 26.6 | ERS2619611 |
| 20599    | <i>H. nigricans</i> | Honduras | 2006-06-04 | 15.9558  | -083.2931 | 24.2 | ERS2619612 |
| 20600    | <i>H. nigricans</i> | Honduras | 2006-06-04 | 15.9558  | -083.2931 | 25.6 | ERS2619613 |
| 20601    | <i>H. nigricans</i> | Honduras | 2006-06-04 | 15.9558  | -083.2931 | 22.8 | ERS2619614 |
| 20602    | <i>H. nigricans</i> | Honduras | 2006-06-04 | 15.9558  | -083.2931 | 23   | ERS2619615 |
| 20603    | <i>H. nigricans</i> | Honduras | 2006-06-04 | 15.9558  | -083.2931 | 26   | ERS2619616 |
| 20604    | <i>H. nigricans</i> | Honduras | 2006-06-04 | 15.9558  | -083.2931 | 20.3 | ERS2619617 |
| 20605    | <i>H. nigricans</i> | Honduras | 2006-06-04 | 15.9558  | -083.2931 | 22.9 | ERS2619618 |
| 20606    | <i>H. nigricans</i> | Honduras | 2006-06-04 | 15.9558  | -083.2931 | 22.6 | ERS2619619 |
| 20607    | <i>H. nigricans</i> | Honduras | 2006-06-04 | 15.9558  | -083.2931 | 25.9 | ERS2619620 |
| 20608    | <i>H. nigricans</i> | Honduras | 2006-06-04 | 15.9558  | -083.2931 | 24.6 | ERS2619621 |
| 20609    | <i>H. nigricans</i> | Honduras | 2006-06-04 | 15.9558  | -083.2931 | 26.2 | ERS2619622 |
| 20610    | <i>H. nigricans</i> | Honduras | 2006-06-04 | 15.9558  | -083.2931 | 22.9 | ERS2619623 |
| 16_21-30 | <i>H. nigricans</i> | Panama   | 2016       | -        | -         | 89.1 | ERS2619624 |
| 18418    | <i>H. nigricans</i> | Panama   | 2004-05-12 | 09.3775  | -082.3039 | 18.7 | ERS2619625 |
| 18424    | <i>H. nigricans</i> | Panama   | 2004-05-12 | 10.2392  | -083.1731 | 19.3 | ERS2619626 |
| 18428    | <i>H. nigricans</i> | Panama   | 2004-05-12 | 10.2392  | -083.1731 | 19.1 | ERS2619627 |
| 18436    | <i>H. nigricans</i> | Panama   | 2004-05-12 | 09.3775  | -082.3039 | 9.8  | ERS2619628 |
| 18901    | <i>H. nigricans</i> | Panama   | 2005-03-25 | 09.2983  | -082.2894 | 25.6 | ERS2619629 |
| 18902    | <i>H. nigricans</i> | Panama   | 2005-03-25 | 09.2983  | -082.2894 | 22.4 | ERS2619630 |
| 18903    | <i>H. nigricans</i> | Panama   | 2005-03-25 | 09.2983  | -082.2894 | 17.1 | ERS2619631 |
| 18904    | <i>H. nigricans</i> | Panama   | 2005-03-25 | 09.2983  | -082.2894 | 20.1 | ERS2619632 |
| 18905    | <i>H. nigricans</i> | Panama   | 2005-03-25 | 09.2983  | -082.2894 | 22.2 | ERS2619633 |
| 18906    | <i>H. nigricans</i> | Panama   | 2005-03-25 | 09.2983  | -082.2894 | 26.7 | ERS2619634 |
| 18907    | <i>H. nigricans</i> | Panama   | 2005-03-25 | 09.2983  | -082.2894 | 18.1 | ERS2619635 |
| 18909    | <i>H. nigricans</i> | Panama   | 2005-03-25 | 09.2983  | -082.2894 | 21.9 | ERS2619636 |
| 18152    | <i>H. puella</i>    | Belize   | 2004-07-25 | 16.7653  | -088.1442 | 23.4 | ERS2619637 |
| 18154    | <i>H. puella</i>    | Belize   | 2004-07-25 | 16.7653  | -088.1442 | 24.6 | ERS2619638 |
| 18161    | <i>H. puella</i>    | Belize   | 2004-07-26 | 16.8058  | -088.0792 | 18.4 | ERS2619639 |
| 18166    | <i>H. puella</i>    | Belize   | 2004-07-25 | 16.7653  | -088.1442 | 24.2 | ERS2619640 |
| 18169    | <i>H. puella</i>    | Belize   | 2004-07-25 | 16.7653  | -088.1442 | 19.6 | ERS2619641 |
| 18172    | <i>H. puella</i>    | Belize   | 2004-07-25 | 16.7653  | -088.1442 | 23.4 | ERS2619642 |
| 18174    | <i>H. puella</i>    | Belize   | 2004-07-25 | 16.7653  | -088.1442 | 24.8 | ERS2619643 |
| 18175    | <i>H. puella</i>    | Belize   | 2004-07-25 | 16.7653  | -088.1442 | 22.2 | ERS2619644 |
| 18176    | <i>H. puella</i>    | Belize   | 2004-07-25 | 16.7653  | -088.1442 | 29   | ERS2619645 |
| 18178    | <i>H. puella</i>    | Belize   | 2004-07-25 | 16.7653  | -088.1442 | 22.9 | ERS2619646 |
| 18179    | <i>H. puella</i>    | Belize   | 2004-07-25 | 16.7653  | -088.1442 | 22.1 | ERS2619647 |
| 18180    | <i>H. puella</i>    | Belize   | 2004-07-25 | 16.7653  | -088.1442 | 21.7 | ERS2619648 |
| 20551    | <i>H. puella</i>    | Honduras | 2006-06-04 | 15.9558  | -083.2931 | 23   | ERS2619649 |

**Supplementary Table 3b:** Samples used for resequencing (continued, Samples 51-100).

| <b>ID</b> | <b>Species</b>     | <b>Location</b> | <b>Date</b> | <b>Latitude</b> | <b>Longitude</b> | <b>Cov.</b> | <b>Acces. Nr.</b> |
|-----------|--------------------|-----------------|-------------|-----------------|------------------|-------------|-------------------|
| 20552     | <i>H. puella</i>   | Honduras        | 2006-06-04  | 15.9558         | -83.2931         | 24.5        | ERS2619650        |
| 20553     | <i>H. puella</i>   | Honduras        | 2006-06-04  | 15.9558         | -83.2931         | 26.2        | ERS2619651        |
| 20554     | <i>H. puella</i>   | Honduras        | 2006-06-04  | 15.9558         | -83.2931         | 22          | ERS2619652        |
| 20555     | <i>H. puella</i>   | Honduras        | 2006-06-04  | 15.9558         | -83.2931         | 23.2        | ERS2619653        |
| 20556     | <i>H. puella</i>   | Honduras        | 2006-06-04  | 15.9558         | -83.2931         | 29.1        | ERS2619654        |
| 20558     | <i>H. puella</i>   | Honduras        | 2006-06-04  | 15.9558         | -83.2931         | 25.5        | ERS2619655        |
| 20559     | <i>H. puella</i>   | Honduras        | 2006-06-04  | 15.9558         | -83.2931         | 26          | ERS2619656        |
| 20625     | <i>H. puella</i>   | Honduras        | 2006-06-05  | 15.9558         | -83.2931         | 21.8        | ERS2619657        |
| 20633     | <i>H. puella</i>   | Honduras        | 2006-06-05  | 15.9558         | -83.2931         | 27.6        | ERS2619658        |
| 20635     | <i>H. puella</i>   | Honduras        | 2006-06-05  | 15.9558         | -83.2931         | 26.3        | ERS2619659        |
| 20638     | <i>H. puella</i>   | Honduras        | 2006-06-05  | 15.9558         | -83.2931         | 21.7        | ERS2619660        |
| 18419     | <i>H. puella</i>   | Panama          | 2004-05-12  | 10.2392         | -83.1731         | 19.8        | ERS2619661        |
| 18421     | <i>H. puella</i>   | Panama          | 2004-05-12  | 10.2392         | -83.1731         | 22.7        | ERS2619662        |
| 18422     | <i>H. puella</i>   | Panama          | 2004-05-12  | 9.3775          | -82.3039         | 22.9        | ERS2619663        |
| 18426     | <i>H. puella</i>   | Panama          | 2004-05-12  | 10.2392         | -83.1731         | 20.9        | ERS2619664        |
| 18427     | <i>H. puella</i>   | Panama          | 2004-05-12  | 10.2392         | -83.1731         | 21.3        | ERS2619665        |
| 18429     | <i>H. puella</i>   | Panama          | 2004-05-12  | 10.2392         | -83.1731         | 23.5        | ERS2619666        |
| 18430     | <i>H. puella</i>   | Panama          | 2004-05-12  | 10.2392         | -83.1731         | 19.5        | ERS2619667        |
| 18432     | <i>H. puella</i>   | Panama          | 2004-05-12  | 10.2392         | -83.1731         | 21.6        | ERS2619668        |
| 18434     | <i>H. puella</i>   | Panama          | 2004-05-12  | 9.3775          | -82.3039         | 25.7        | ERS2619669        |
| 18912     | <i>H. puella</i>   | Panama          | 2005-03-25  | 9.2983          | -82.2894         | 23          | ERS2619670        |
| 18915     | <i>H. puella</i>   | Panama          | 2005-03-25  | 9.2983          | -82.2894         | 19.4        | ERS2619671        |
| 18917     | <i>H. puella</i>   | Panama          | 2005-03-25  | 9.2983          | -82.2894         | 18.8        | ERS2619672        |
| 27678     | <i>H. puella</i>   | Panama          | 2013-04-12  | 9.3681          | -82.2928         | 89.8        | ERS2619673        |
| 18163     | <i>H. unicolor</i> | Belize          | 2004-07-25  | 16.7653         | -88.1442         | 24.5        | ERS2619674        |
| 18261     | <i>H. unicolor</i> | Belize          | 2004-07-24  | -               | -                | 21.8        | ERS2619675        |
| 18267     | <i>H. unicolor</i> | Belize          | 2004-07-24  | -               | -                | 28.4        | ERS2619676        |
| 18274     | <i>H. unicolor</i> | Belize          | 2004-07-24  | -               | -                | 24.4        | ERS2619677        |
| 18276     | <i>H. unicolor</i> | Belize          | 2004-07-25  | 16.7653         | -88.1442         | 23.8        | ERS2619678        |
| 19881     | <i>H. unicolor</i> | Belize          | 2005-08-16  | 16.7078         | -87.8598         | 23.7        | ERS2619679        |
| 20092     | <i>H. unicolor</i> | Belize          | 2005-08-15  | 16.8936         | -88.1226         | 23.5        | ERS2619680        |
| 20120     | <i>H. unicolor</i> | Belize          | 2005-08-11  | 16.8008         | -88.0789         | 30.3        | ERS2619681        |
| 20126     | <i>H. unicolor</i> | Belize          | 2005-08-12  | 16.8936         | -88.1226         | 22.4        | ERS2619682        |
| 20128     | <i>H. unicolor</i> | Belize          | 2005-08-12  | 16.8936         | -88.1226         | 22.6        | ERS2619683        |
| 20135     | <i>H. unicolor</i> | Belize          | 2005-08-12  | 16.8936         | -88.1226         | 21.2        | ERS2619684        |
| 20149     | <i>H. unicolor</i> | Belize          | 2005-08-12  | 16.8936         | -88.1226         | 23.5        | ERS2619685        |
| 20560     | <i>H. unicolor</i> | Honduras        | 2006-06-04  | 15.9558         | -83.2931         | 21.3        | ERS2619686        |
| 20561     | <i>H. unicolor</i> | Honduras        | 2006-06-04  | 15.9558         | -83.2931         | 24.2        | ERS2619687        |
| 20562     | <i>H. unicolor</i> | Honduras        | 2006-06-04  | 15.9558         | -83.2931         | 25.4        | ERS2619688        |
| 20563     | <i>H. unicolor</i> | Honduras        | 2006-06-04  | 15.9558         | -83.2931         | 23.1        | ERS2619689        |
| 20564     | <i>H. unicolor</i> | Honduras        | 2006-06-04  | 15.9558         | -83.2931         | 28.9        | ERS2619690        |
| 20565     | <i>H. unicolor</i> | Honduras        | 2006-06-04  | 15.9558         | -83.2931         | 25          | ERS2619691        |
| 20566     | <i>H. unicolor</i> | Honduras        | 2006-06-04  | 15.9558         | -83.2931         | 27.4        | ERS2619692        |
| 20567     | <i>H. unicolor</i> | Honduras        | 2006-06-04  | 15.9558         | -83.2931         | 27.3        | ERS2619693        |
| 20568     | <i>H. unicolor</i> | Honduras        | 2006-06-04  | 15.9558         | -83.2931         | 30.1        | ERS2619694        |
| 20571     | <i>H. unicolor</i> | Honduras        | 2006-06-04  | 15.9558         | -83.2931         | 24.6        | ERS2619695        |
| 20572     | <i>H. unicolor</i> | Honduras        | 2006-06-04  | 15.9558         | -83.2931         | 23.8        | ERS2619696        |
| 16_31-40  | <i>H. unicolor</i> | Panama          | 2016        | -               | -                | 53.4        | ERS2619697        |
| 18420     | <i>H. unicolor</i> | Panama          | 2004-05-12  | 10.2392         | -83.1731         | 20.3        | ERS2619698        |
| 18435     | <i>H. unicolor</i> | Panama          | 2004-06-23  | 9.3328          | -82.2547         | 20.2        | ERS2619699        |

**Supplementary Table 3c:** Samples used for resequencing (continued, Samples 101-110).

| ID    | Species            | Location | Date       | Latitude | Longitude | Cov. | Acces. Nr. |
|-------|--------------------|----------|------------|----------|-----------|------|------------|
| 18439 | <i>H. unicolor</i> | Panama   | 2004-06-25 | 9.3328   | -82.2547  | 23.8 | ERS2619700 |
| 18440 | <i>H. unicolor</i> | Panama   | 2004-06-25 | 9.3328   | -82.2547  | 19.7 | ERS2619701 |
| 18441 | <i>H. unicolor</i> | Panama   | 2004-06-25 | 9.3328   | -82.2547  | 25.1 | ERS2619702 |
| 18442 | <i>H. unicolor</i> | Panama   | 2004-07-08 | 9.2983   | -82.2894  | 20.6 | ERS2619703 |
| 18445 | <i>H. unicolor</i> | Panama   | 2004-06-28 | 9.3328   | -82.2547  | 19   | ERS2619704 |
| 18446 | <i>H. unicolor</i> | Panama   | 2004-06-29 | 9.3328   | -82.2547  | 26   | ERS2619705 |
| 18447 | <i>H. unicolor</i> | Panama   | 2004-07-09 | 9.2894   | -82.2589  | 16.8 | ERS2619706 |
| 18448 | <i>H. unicolor</i> | Panama   | 2004-06-28 | 9.3328   | -82.2547  | 26.1 | ERS2619707 |
| 18450 | <i>H. unicolor</i> | Panama   | 2004-06-25 | 9.3328   | -82.2547  | 17.7 | ERS2619708 |
| 18454 | <i>H. unicolor</i> | Panama   | 2004-06-30 | 9.3481   | -82.2633  | 22.7 | ERS2619709 |

**Supplementary Table 4:** Overview of the sequencing data generated for the assembly of the *Hypoplectrus* genome (PE: paired end, MP: mate pair, PB: PacBio)

| Nr | Tissue | Type             | Type | Targeted insert size (bp) | Mapped insert size (bp, mean $\pm$ SD) | Read length (bp) | Coverage ( $\times$ ) |
|----|--------|------------------|------|---------------------------|----------------------------------------|------------------|-----------------------|
| 1  | gill   | PE               | DNA  | 300                       | 264 $\pm$ 94                           | 151              | 24                    |
| 2  | gill   | PE               | DNA  | 300                       | 255 $\pm$ 80                           | 151              | 144                   |
| 3  | gill   | PE               | DNA  | 500                       | 299 $\pm$ 106                          | 151              | 46                    |
| 4  | gill   | PE               | DNA  | 800                       | 321 $\pm$ 123                          | 151              | 67                    |
| 5  | muscle | PE<br>(PCR-free) | DNA  | 550                       | 579 $\pm$ 155                          | 251              | 100                   |
| 6  | muscle | MP               | DNA  | 3000                      | 2457 $\pm$ 639                         | 101              | 34                    |
| 7  | muscle | MP               | DNA  | 6000                      | 4329 $\pm$ 1110                        | 101              | 31                    |
| 8  | muscle | PB               | DNA  | -                         | -                                      | 50–33680         | 16                    |
| 9  | gill   | PE               | RNA  | -                         | -                                      | 251              | -                     |
| 10 | muscle | PE               | RNA  | -                         | -                                      | 251              | -                     |
| 11 | liver  | PE               | RNA  | -                         | -                                      | 251              | -                     |

**Supplementary Table 5:** Samples used for RNA sequencing

| ID      | Date       | Species             | Latitude | Longitude | Raw reads | Filtered reads (n, 10 <sup>6</sup> ) | Alignment rate (%) | Acession Number |
|---------|------------|---------------------|----------|-----------|-----------|--------------------------------------|--------------------|-----------------|
| 28385   | 2017-02-06 | <i>H. nigricans</i> | 09.318   | -082.222  | 2x7.4     | 2x4.7                                | 60.84              | ERS2619746      |
| 28387   | 2017-02-06 | <i>H. nigricans</i> | 09.318   | -082.222  | 2x6.3     | 2x4.7                                | 59.34              | ERS2619747      |
| 28390   | 2017-02-06 | <i>H. nigricans</i> | 09.318   | -082.222  | 2x5.9     | 2x4.4                                | 61.72              | ERS2619748      |
| 28394   | 2017-02-07 | <i>H. nigricans</i> | 09.301   | -082.294  | 2x4.8     | 2x3.0                                | 63.55              | ERS2619749      |
| 28399   | 2017-02-07 | <i>H. nigricans</i> | 09.301   | -082.294  | 2x7.3     | 2x5.2                                | 62.11              | ERS2619750      |
| AG9RX46 | 2017-02-06 | <i>H. nigricans</i> | 09.318   | -082.222  | 2x7.1     | 2x5.3                                | 60.73              | ERS2619751      |
| AG9RX49 | 2017-02-07 | <i>H. nigricans</i> | 09.301   | -082.294  | 2x7.1     | 2x5.3                                | 63.38              | ERS2619752      |
| AG9RX50 | 2017-02-07 | <i>H. nigricans</i> | 09.301   | -082.294  | 2x6.8     | 2x4.8                                | 60.68              | ERS2619753      |
| AG9RX52 | 2017-02-07 | <i>H. nigricans</i> | 09.301   | -082.294  | 2x6.7     | 2x4.9                                | 59.98              | ERS2619754      |
| 28384   | 2017-02-06 | <i>H. puella</i>    | 9.318    | -082.222  | 2x6.1     | 2x4.2                                | 63.13              | ERS2619755      |
| AG9RX47 | 2017-02-06 | <i>H. puella</i>    | 09.318   | -082.222  | 2x5.5     | 2x4.0                                | 68.03              | ERS2619756      |
| AG9RX48 | 2017-02-07 | <i>H. puella</i>    | 09.301   | -082.294  | 2x6.2     | 2x4.5                                | 66.079             | ERS2619757      |
| AG9RX51 | 2017-02-07 | <i>H. puella</i>    | 09.301   | -082.294  | 2x6.7     | 2x5.0                                | 61.41              | ERS2619758      |
| AG9RX53 | 2017-02-07 | <i>H. puella</i>    | 09.301   | -082.294  | 2x6.3     | 2x4.5                                | 62                 | ERS2619759      |
| PL17_02 | 2017-02-07 | <i>H. puella</i>    | 09.301   | -082.294  | 2x6.1     | 2x4.6                                | 62.61              | ERS2619760      |
| PL17_04 | 2017-02-07 | <i>H. puella</i>    | 09.301   | -082.294  | 2x6.5     | 2x4.7                                | 63.17              | ERS2619761      |
| PL17_16 | 2017-02-09 | <i>H. puella</i>    | 09.367   | -082.291  | 2x7.5     | 2x5.3                                | 62.1               | ERS2619762      |
| PL17_17 | 2017-02-09 | <i>H. puella</i>    | 09.367   | -082.291  | 2x7.3     | 2x5.3                                | 61.72              | ERS2619763      |
| PL17_18 | 2017-02-09 | <i>H. puella</i>    | 09.367   | -082.291  | 2x6.3     | 2x4.6                                | 63.68              | ERS2619764      |
| 28383   | 2017-02-06 | <i>H. unicolor</i>  | 09.318   | -082.222  | 2x6.8     | 2x4.7                                | 61.04              | ERS2619765      |
| 28391   | 2017-02-07 | <i>H. unicolor</i>  | 09.301   | -082.294  | 2x7.1     | 2x5.2                                | 61.75              | ERS2619766      |
| AG9RX54 | 2017-02-06 | <i>H. unicolor</i>  | 09.318   | -082.222  | 2x5.5     | 2x3.9                                | 59.2               | ERS2619767      |
| AG9RX55 | 2017-02-07 | <i>H. unicolor</i>  | 09.301   | -082.294  | 2x6.3     | 2x4.7                                | 61.54              | ERS2619768      |
| PL17_01 | 2017-02-07 | <i>H. unicolor</i>  | 09.301   | -082.294  | 2x8.1     | 2x5.9                                | 62.11              | ERS2619769      |

**Supplementary Table 6:** Whole-genome weighted mean  $F_{ST}$  estimates among *H. nigricans*, *H. puella* & *H. unicolor*.

| Location | <i>H. nigricans</i><br><i>H. puella</i> | <i>H. nigricans</i><br><i>H. unicolor</i> | <i>H. puella</i><br><i>H. unicolor</i> | All    |
|----------|-----------------------------------------|-------------------------------------------|----------------------------------------|--------|
| Global   | 0.0079                                  | 0.0098                                    | 0.0027                                 | 0.0068 |
| Belize   | 0.0168                                  | 0.0153                                    | 0.0047                                 | 0.0123 |
| Honduras | 0.0033                                  | 0.0051                                    | 0.0030                                 | 0.0038 |
| Panama   | 0.0274                                  | 0.0348                                    | 0.0125                                 | 0.0249 |

**Supplementary Table 7:** Anchoring statistics. Size selection refers to the removal of contigs smaller than 501 bp, which was done after anchoring.

|                  | pre size selection |             |             | post size selection (> 500 bp) |             |            |
|------------------|--------------------|-------------|-------------|--------------------------------|-------------|------------|
|                  | Anchored           | Oriented    | Unplaced    | Anchored                       | Oriented    | Unplaced   |
| Markers (unique) | 2602               | 1991        | 0           | 2658                           | 2012        | 0          |
| Markers per Mb   | 4.6                | 4.5         | 0           | 4.7                            | 4.6         | 0          |
| N50 Scaffolds    | 50                 | 48          | 0           | 38                             | 36          | 0          |
| Scaffolds        | 376                | 131         | 502438      | 380                            | 127         | 14341      |
| with 1 marker    | 128                | 0           | 0           | 131                            | 0           | 0          |
| with 2 markers   | 64                 | 17          | 0           | 65                             | 17          | 0          |
| with 3 markers   | 33                 | 12          | 0           | 32                             | 11          | 0          |
| ≥ 4 markers      | 151                | 102         | 0           | 152                            | 99          | 0          |
| Total bases      | 559 614 477        | 437 616 820 | 140 002 979 | 561 222 590                    | 434 765 886 | 51 030 271 |
| percent          | 80.0               | 62.6        | 20.0        | 91.7                           | 71.0        | 8.3        |

**Supplementary Table 8: Assembly statistics**

|               | <b>Super-Scaffolds</b> | <b>Scaffolds</b> | <b>Contigs</b> | <b>BUSCO</b>         | <b>n</b> | <b>%</b> |
|---------------|------------------------|------------------|----------------|----------------------|----------|----------|
| Sequences (n) | 14 375                 | 14 721           | 58 827         | Complete Single-Copy | 2597     | 85       |
| Min (bp)      | 501                    | 501              | 28             | Complete Duplicated  | 61       | 2.0      |
| Median (bp)   | 902                    | 919              | 3 972          | Fragmented           | 218      | 7.2      |
| Mean (bp)     | 42 594                 | 41 590           | 10 240         | Missing              | 208      | 6.8      |
| Max (bp)      | 31 702 000             | 17 788 340       | 212 451        | Total                | 3023     | 100      |
| Total (bp)    | 612 290 098            | 612 252 861      | 602 376 265    |                      |          |          |
| n50 (bp)      | 24 210 077             | 4 424 055        | 25 823         |                      |          |          |
| n90 (bp)      | 13 699 534             | 304 599          | 5 215          |                      |          |          |
| n95 (bp)      | 108 356                | 2 813            | 89 255         |                      |          |          |
